# Supplementary material for: Can youth-engaged research facilitate equitable access to contraception in Canada? The qualitative study protocol for the Ask Us project
Source: PubMed Central journal article supplement — BMJ Open. 2023 Mar 2;13(3):e070904. doi: 10.1136/bmjopen-2022-070904 (PMC9990688; doi:10.1136/bmjopen-2022-070904), 2023-03-02
Supplement: bmjopen-2022-070904.draft_revisions.pdf [file bmjopen-2022-070904.draft_revisions.pdf]

# BMJ Open

BMJ Open is committed to open peer review. As part of this commitment we make the peer review history of every article we publish publicly available.

When an article is published we post the peer reviewers' comments and the authors' responses online. We also post the versions of the paper that were used during peer review. These are the versions that the peer review comments apply to.

The versions of the paper that follow are the versions that were submitted during the peer review process. They are not the versions of record or the final published versions. They should not be cited or distributed as the published version of this manuscript.

BMJ Open is an open access journal and the full, final, typeset and author-corrected version of record of the manuscript is available on our site with no access controls, subscription charges or pay-per-view fees (<http://bmjopen.bmj.com>).

If you have any questions on BMJ Open's open peer review process please email [info.bmjopen@bmj.com](mailto:info.bmjopen@bmj.com)

# BMJ Open

## Can youth-engaged research facilitate equitable access to contraception in Canada?: A study protocol

|                               |                                                                                                                                                                                                                                                                                                                                                                                                                                                                                                                                                                                                                                                                                                                                                                                                                                                                                                                                                                                                                                                                                                                                                                                                                                                                                                                                                                                                                                                                                                                                                                                                                                                                                                                                             |
|-------------------------------|---------------------------------------------------------------------------------------------------------------------------------------------------------------------------------------------------------------------------------------------------------------------------------------------------------------------------------------------------------------------------------------------------------------------------------------------------------------------------------------------------------------------------------------------------------------------------------------------------------------------------------------------------------------------------------------------------------------------------------------------------------------------------------------------------------------------------------------------------------------------------------------------------------------------------------------------------------------------------------------------------------------------------------------------------------------------------------------------------------------------------------------------------------------------------------------------------------------------------------------------------------------------------------------------------------------------------------------------------------------------------------------------------------------------------------------------------------------------------------------------------------------------------------------------------------------------------------------------------------------------------------------------------------------------------------------------------------------------------------------------|
| Journal:                      | <i>BMJ Open</i>                                                                                                                                                                                                                                                                                                                                                                                                                                                                                                                                                                                                                                                                                                                                                                                                                                                                                                                                                                                                                                                                                                                                                                                                                                                                                                                                                                                                                                                                                                                                                                                                                                                                                                                             |
| Manuscript ID                 | bmjopen-2022-070904                                                                                                                                                                                                                                                                                                                                                                                                                                                                                                                                                                                                                                                                                                                                                                                                                                                                                                                                                                                                                                                                                                                                                                                                                                                                                                                                                                                                                                                                                                                                                                                                                                                                                                                         |
| Article Type:                 | Protocol                                                                                                                                                                                                                                                                                                                                                                                                                                                                                                                                                                                                                                                                                                                                                                                                                                                                                                                                                                                                                                                                                                                                                                                                                                                                                                                                                                                                                                                                                                                                                                                                                                                                                                                                    |
| Date Submitted by the Author: | 08-Dec-2022                                                                                                                                                                                                                                                                                                                                                                                                                                                                                                                                                                                                                                                                                                                                                                                                                                                                                                                                                                                                                                                                                                                                                                                                                                                                                                                                                                                                                                                                                                                                                                                                                                                                                                                                 |
| Complete List of Authors:     | <p>Munro, Sarah; The University of British Columbia, Department of Obstetrics and Gynaecology; The University of British Columbia, Centre for Health Evaluation and Outcome Sciences<br/>         Di Meglio, Giuseppina ; McGill University Health Centre, Montreal Children's Hospital<br/>         Williams, Aleyah; The University of British Columbia, Department of Obstetrics and Gynaecology<br/>         Barbic, Skye; The University of British Columbia, Occupational Science and Occupational Therapy<br/>         Begun, Stephanie; University of Toronto, Factor-Inwentash Faculty of Social Work<br/>         Black, Amanda; University of Ottawa, Department of Obstetrics and Gynecology<br/>         Carson, Andrea; Nova Scotia Health, Research, Innovation, and Discovery<br/>         Fortin, Michelle; Options for Sexual Health<br/>         Jacob, Kaiya; Youth Partner<br/>         Khan, Zeba; The University of British Columbia, Department of Obstetrics and Gynaecology<br/>         Martin-Misener, Ruth; Dalhousie University<br/>         Meherali, Salima; University of Alberta, Faculty of Nursing<br/>         Paller, Victoria; The University of British Columbia, Department of Obstetrics and Gynaecology<br/>         Seiyad, Hajar; Youth Partner<br/>         Vallée, Carol-Anne; The University of British Columbia, Department of Obstetrics and Gynaecology<br/>         Wahl, Kate; The University of British Columbia, Department of Obstetrics and Gynaecology<br/>         Norman, Wendy; The University of British Columbia, Dept of Family Practice; London School of Hygiene and Tropical Medicine Faculty of Public Health and Policy, Public Health, Environments &amp; Society</p> |
| Keywords:                     | Health policy < HEALTH SERVICES ADMINISTRATION & MANAGEMENT, GYNAECOLOGY, Community child health < PAEDIATRICS, QUALITATIVE RESEARCH                                                                                                                                                                                                                                                                                                                                                                                                                                                                                                                                                                                                                                                                                                                                                                                                                                                                                                                                                                                                                                                                                                                                                                                                                                                                                                                                                                                                                                                                                                                                                                                                        |
|                               |                                                                                                                                                                                                                                                                                                                                                                                                                                                                                                                                                                                                                                                                                                                                                                                                                                                                                                                                                                                                                                                                                                                                                                                                                                                                                                                                                                                                                                                                                                                                                                                                                                                                                                                                             |

1  
2  
3  
4  
5  
6  
7  
8  
9  
10  
11  
12  
13  
14  
15  
16  
17  
18  
19  
20  
21  
22  
23  
24  
25  
26  
27  
28  
29  
30  
31  
32  
33  
34  
35  
36  
37  
38  
39  
40  
41  
42  
43  
44  
45  
46  
47  
48  
49  
50  
51  
52  
53  
54  
55  
56  
57  
58  
59  
60

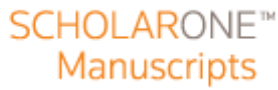

## Can youth-engaged research facilitate equitable access to contraception in Canada?: A study protocol

### Authors:

Sarah Munro, PhD,<sup>1,2</sup> Giuseppina Di Meglio, MD, MPH,<sup>3</sup> Aleyah Williams, MPH,<sup>1</sup> Skye Barbic, PhD,<sup>5,6</sup> Stephanie Begun, PhD, MSW,<sup>7</sup> Amanda Black,<sup>8</sup> MD, MPH, Andrea Carson, PhD,<sup>9</sup> Michelle Fortin,<sup>10</sup> Kaiya Jacob,<sup>4</sup> Zeba Khan, BSc,<sup>1</sup> Ruth Martin-Misener, NP, RN,<sup>11</sup> Salima Meherali, PhD, RN,<sup>12</sup> Victoria Paller, BHSc,<sup>1</sup> Hajar Seiyad,<sup>4</sup> Carol-Anne Vallée, MD,<sup>1</sup> Kate Wahl, MSc,<sup>1</sup> Wendy V. Norman, MD, MHSc<sup>13,14</sup>

1. Department of Obstetrics and Gynaecology, The University of British Columbia
2. Centre for Health Evaluation and Outcome Sciences, The University of British Columbia
3. Montreal Children's Hospital / McGill University Health Center
4. Youth Partner
5. Department of Occupational Science and Occupational Therapy, The University of British Columbia
6. Foundry, Providence Health Care
7. Factor-Inwentash Faculty of Social Work, University of Toronto
8. Department of Obstetrics and Gynecology, University of Ottawa
9. Research, Innovation, and Discovery, Nova Scotia Health
10. Options for Sexual Health
11. School of Nursing, Dalhousie University
12. College of Health Science, Faculty of Nursing, University of Alberta
13. Department of Family Practice, University of British Columbia
14. Dept of Public Health, Environments and Society, Faculty of Public Health & Policy, London School of Hygiene and Tropical Medicine

### \* Corresponding author:

Sarah Munro  
588-1081 Burrard Street, Vancouver, BC V6Z 1Y6 (St. Paul's Hospital)  
Phone: 604-682-2344 x62893 Email: [sarah.munro@ubc.ca](mailto:sarah.munro@ubc.ca)

### Keywords

Contraception, Youth, Integrated knowledge translation, Knowledge mobilization, Health policy

**Word count:** 3,994

## Abstract

### Introduction

There is little to no evidence in Canada on the barriers that youth face when accessing contraception. We seek to identify the contraception access, experiences, beliefs, attitudes, knowledge, and needs of youth in Canada, from the perspectives of youth and youth service providers.

### Methods and analysis

This prospective, mixed methods, integrated knowledge mobilization study will involve a national sample of youth, healthcare and social service providers, and policy makers recruited via a novel relational mapping and outreach approach led by youth. Phase One will centre the voices of youth and their service providers through in-depth one-on-one interviews. We will explore the factors influencing youth access to contraception, theoretically guided by Levesque's Access to Care framework. Phase Two will focus on the co-creation and evaluation of knowledge translation products (youth stories) with youth, service providers, and policy makers.

### Ethics and dissemination

Ethical approval was received from the University of British Columbia's Research Ethics Board (H21- 01091). Full open-access publication of the work will be sought in an international peer-reviewed journal. Findings will be disseminated to youth and service providers through social media, newsletters, and communities of practice, and to policy makers through invited evidence briefs and face-to-face presentations.

### Strengths and limitations of this study

- Our theory-informed, qualitative approach will generate rich evidence on the factors that influence equitable access to contraception care for youth.
- Our integrated knowledge translation approach provides youth with the flexibility to determine the most meaningful methods of engagement, data collection, and knowledge mobilization.
- Youth stories about contraceptive access will be developed into end-of-project knowledge translation stories in partnership with youth, to accelerate the uptake of our study results into policy and practice.

## Can youth-engaged research facilitate equitable access to contraception in Canada?: Protocol for the Storytelling about Options and Reproductive access for Youth (STORY) Project

### INTRODUCTION

The unmet need for contraception among youth remains high globally, particularly for those who face structural and systemic barriers to equitable health service access.(1,2) Recent data on youth contraception patterns in Canada indicate that youth face cost barriers due to lack of subsidized options and/or household income, and youth who require or desire confidential access have the most difficulty acquiring their preferred contraception methods.(3,4) Youth with the ability to become pregnant have the right to choose if and when to have children.(5) It is necessary to provide youth with health system supports that provide access to contraception that matches their needs, preferences, and attitudes.

In Canada, the most effective contraceptive options, Long-Acting Reversible Contraception (LARC), are used by less than 10% of people of all ages with a need for contraception, and uptake is even lower among youth,(6–9) young people in the period associated with the transition from adolescence to adulthood.(10) These methods are recommended as a first-line option for youth by the Canadian Paediatric Society (9) and Society of Obstetricians and Gynaecologists primarily because of their effectiveness in pregnancy prevention.(7,8) These methods include intrauterine devices (IUD) and the subdermal contraceptive implant. Low uptake of these options across populations is due to myriad individual, social, health system factors. For instance, lack of geographic access to LARC placement and removal options may make it impossible to translate a person's desire to prevent pregnancy into health behaviours for identifying and using their chosen method.(11)

1  
2  
3  
4  
5  
6 There are limited Canadian data on the factors influencing contraception access among youth;  
7  
8 however, cost is a clear contributor. Analysis of 2009-2014 Canadian Community Health Survey  
9  
10 data showed that among females aged 15 to 24 at risk of unintended pregnancy, lower  
11  
12 household income was associated with decreased use of oral contraceptives and increased  
13  
14 reliance on injectable contraceptives or condoms alone.(4) In a survey of youth aged 14 to 21 in  
15  
16 the province of Quebec, youth who reported being unable to access their preferred method of  
17  
18 contraception most often cited cost as a barrier.(12) Canadian provincial and territorial  
19  
20 healthcare plans cover the costs of specific drugs on their formularies for populations including  
21  
22 those who are low-income, receive social benefits, or are Indigenous. Yet most do not cover all  
23  
24 contraceptive methods, and coverage through work-subsidized extended health benefits is  
25  
26 inconsistent, creating system-level barriers to the full range of contraceptive options.(13)  
27  
28  
29  
30  
31  
32  
33  
34

35 One related concern for youth is confidentiality. Confidential services increase youths' trust in  
36  
37 their care, which in turn increases the chance that youth will provide a complete sexual history  
38  
39 and discuss concerns and needs that they cannot share with a parent.(9,14) Youth who are  
40  
41 sexually active and experience cultural or familial interdiction require confidential access to  
42  
43 contraception.(15–17) When these youth receive extended health benefits through their parent  
44  
45 or guardian, a report is available to that person. Thus, despite having insurance, youth often will  
46  
47 need to pay directly for contraception, to preserve their confidentiality.(3) Confidentiality is also  
48  
49 of concern for youth in remote or close-knit communities where healthcare workers may be  
50  
51  
52  
53  
54  
55  
56  
57



1  
2  
3 known to them. Yet the existing evidence does not identify how confidentiality influences youth  
4  
5 contraceptive choices in Canada.  
6  
7  
8  
9

10 The literature, albeit limited, about youth and their contraceptive preferences comes primarily  
11  
12 from US (18–26) and UK studies.(27–29) Results of a survey involving contraceptive knowledge  
13  
14 and attitudes of 897 female youth demonstrated that youth have lower awareness and  
15  
16 knowledge about contraceptive options, particularly LARC methods, than people of other  
17  
18 ages.(30) Among teens, 63% misbelieved that a person needed to undergo an operation to have  
19  
20 an IUD, and 71% that negative effects from the contraceptive injection would last their  
21  
22 lifetime.(30) Youth who hold mistaken beliefs about contraception are less likely to seek care  
23  
24 when they become sexually active.(30) Given these data, there is pressing need to understand  
25  
26 contraceptive choices of youth in Canada. In our study we seek to answer the question: *What*  
27  
28 *are the contraception access experiences, beliefs, attitudes, knowledge, and needs of youth in*  
29  
30 *Canada, from the perspectives of youth and youth service providers?*  
31  
32  
33  
34  
35  
36  
37  
38

### 39 **METHODS**

40  
41 We will conduct this four-year study in two phases. Our aims are to:  
42  
43  
44  
45

46 **Aim 1:** Investigate the experiences, beliefs, attitudes, knowledge, and contraceptive access  
47  
48 needs of youth (aged 15 to 25) in Canada from the perspectives of youth and service  
49  
50 providers;  
51  
52  
53  
54  
55  
56  
57

1  
2  
3 **Aim 2:** Identify the attributes of contraceptive options that matter most when making  
4  
5 decisions about methods to use, from the perspectives of youth and service providers; and  
6  
7

8  
9  
10  
11 **Aim 3:** Create and test knowledge translation (KT) products of “youth stories,” to  
12  
13 communicate results to youth, healthcare professionals, and decision makers in Canadian  
14  
15 contraception policy and practice.  
16  
17

### 21 **Study Design**

22  
23  
24 The primary mode of data collection will be one-on-one interviews. Youth stories about  
25  
26 contraceptive access will be developed into end-of-project KT products in partnership with  
27  
28 youth, using principles of narrative theory and user-centred design. These may consist of 2-  
29  
30 minute whiteboard and/or live videos of patient stories or text-based infographics, as well as  
31  
32 evidence briefs for policy makers. We will create and disseminate these youth stories to  
33  
34 Canadian stakeholders (providers, policy makers, and patients) in real time.  
35  
36  
37  
38  
39

### 40 **Integrated knowledge translation**

41  
42 This study is part of the larger research program of our thriving national Contraception and  
43  
44 Abortion Research Team (CART) and builds on our 10 years of family planning research  
45  
46 collaborations. The CART research program is built on an integrated knowledge translation (iKT)  
47  
48 approach whereby policy makers collaborate in all stages of the research process.(31,32) This  
49  
50 approach resulted in rapid removal of federal restrictions on the abortion pill in Canada in 2017,  
51  
52 its first year of availability, making it accessible in primary care settings.(33–38) However,  
53  
54  
55  
56  
57

1  
2  
3 disseminating research with policy makers is challenging when they perceive the data to be  
4  
5 complex or political, as can occur with family planning evidence.(39–41) Our iKT collaborations –  
6  
7 underpinned by an anti-oppressive, equity-based approach of partnering closely with youth  
8  
9 throughout the research process – aim to improve the acceptability, usefulness, and relevance  
10  
11 of knowledge by co-producing it with the people best positioned to make evidence-informed  
12  
13 decisions. This approach aims to shorten the time it takes to move evidence into practice, and in  
14  
15 turn make rapid impact on contraception access for youth in Canada.  
16  
17  
18  
19  
20

### **Phase One: Qualitative Interview Study with Youth and Service Providers (Aims 1 & 2)**

#### **Theoretical framework**

21  
22  
23  
24  
25  
26  
27 Our approach will be guided by social constructivist grounded theory.(42,43) Following feminist  
28  
29 and standpoint theories, constructivist grounded theory emphasizes the importance of  
30  
31 researcher flexibility and positionality. Feminist approaches start from the broad shared goal to  
32  
33 challenge gender-based oppressions and inequities.(44,45) The hallmark of these approaches is  
34  
35 reflexive interviewing. Throughout the study, our team will practice reflexivity by challenging  
36  
37 our assumptions and staying attuned to power imbalances as well as our and participants' social  
38  
39 positions.  
40  
41  
42  
43  
44  
45

46 We will use Levesque's Patient-centered Access to Care framework (46) as a theoretical guide  
47  
48 (Figure 1). Levesque incorporates factors that impact access to care from two perspectives:  
49  
50 supply (Approachability; Acceptability; Availability & Accommodation; Affordability;  
51  
52 Appropriateness); and demand (Ability to Perceive; Seek; Reach; Pay; Engage). These factors are  
53  
54  
55  
56  
57

1  
2  
3 interdependent, contextual, and dynamic. We will conduct interviews with providers (supply)  
4  
5 and youth (demand).  
6  
7  
8  
9

10 *[Insert Figure 1. A conceptual framework of access to care, adapted from Levesque (46)]*  
11  
12  
13  
14

### 15 **Sex and Gender-Based Analysis+**

16  
17 We will collect and report data on self-identified sex and gender, following SAGER guideline  
18 reporting standards.(47) We will consider both gender and sex during recruitment and  
19 screening to ensure that a diverse array of youth participate in the study.(48,49) In qualitative  
20 analysis+, we will consider sex and gender as contextual factors to understand participants'  
21 lived experiences and the process of accessing contraception care. The + sign denotes that  
22 gender does not exist in isolation and intersects with age, income, immigrant status, cultural  
23 background, geographic location, and education to produce conditions of empowerment or  
24 marginalization which, in turn, effect health access.(50)  
25  
26  
27  
28  
29  
30  
31  
32  
33  
34  
35  
36  
37  
38  
39

### 40 **Setting and Participants**

41  
42 We will recruit participants from all Canadian provinces and territories. Participants will include  
43  
44 *A) youth aged 15 to 25, and B) healthcare professionals who provide contraceptive care to*  
45 *youth.* For the purposes of this study, we define youth in both conceptual and temporal terms.  
46  
47 Conceptually, we define youth as individuals in the developmental stage of emerging adulthood,  
48 a well-established definition used to identify the period associated with the transition from  
49 adolescence to adulthood. During this period, young people engage in identity exploration and  
50  
51  
52  
53  
54  
55  
56  
57

1  
2  
3 development in order to transition into their personal and professional lives as adults.(10) While  
4  
5 Statistics Canada defines youth as aged 15 to 29, we selected an upper limit of age 25 as it is  
6  
7 typically used as an age cut-off in Canada for youth contraceptive subsidy programs,(51)  
8  
9 pediatric contraception guidelines,(3,9) and survey-based analyses of youth contraception  
10  
11 access.(4,52) We will invite youth to self-identify through a 3-item screening (*When were you*  
12  
13 *born (year and month)? Do you currently reside in Canada? Have you ever used, wanted, or*  
14  
15 *considered contraception?*). We will include people who use, want, or consider contraception  
16  
17 for purposes in addition to preventing pregnancies. We will exclude people who self-report that  
18  
19 they are younger than 15 or older than 25, or who answer 'No' to any of the above questions.  
20  
21 We will work with our community partners to recruit a spectrum of youth across Canada,  
22  
23 including from low-income, rural, newcomer, and racialized communities as well as trans and  
24  
25 gender-diverse people. We will advertise the study materials in multiple languages and include  
26  
27 Youth Research Associates (YRAs) on our team who speak English plus one or more of French,  
28  
29 Mandarin, Cantonese, Punjabi, Hindi, or Spanish. We will hire a translator or community partner  
30  
31 for participants who feel most comfortable conducting the interview in another language.  
32  
33  
34  
35  
36  
37  
38  
39  
40  
41  
42

### 43 **Recruitment**

44  
45 Our two-phase sampling strategy will begin with a purposeful sampling frame across provinces  
46  
47 and territories, rural and urban settings, gender, age (15-17, 19-22, and 23-25), and ethnicity. As  
48  
49 data collection progresses, we will engage in additional theoretical sampling to  
50  
51 confirm/disconfirm results, fill in data gaps, and refine our evolving theory.  
52  
53  
54  
55  
56  
57

- 1  
2  
3  
4  
5  
6  
7  
8  
9  
10  
11  
12  
13  
14  
15  
16  
17  
18  
19  
20  
21  
22  
23  
24  
25  
26  
27  
28  
29  
30  
31  
32  
33  
34  
35  
36  
37  
38  
39  
40  
41  
42  
43  
44
- **Youth:** We will use a multifaceted, community-based strategy to recruit youth, including a study website, social marketing campaign (e.g. Instagram advertising and re-posting of study ads by youth- and health-oriented organizations), and snowball sampling. Youth researchers on our team will design and implement a youth outreach strategy using principles of ‘relational’ stakeholder mapping (53–56) to engage youth-serving organizations. These YRAs will then engage individuals from youth-serving organizations in knowledge brokering; e.g. they may provide social media content development training in exchange for a welcome platform to share information about our project.
  - **Healthcare professionals:** We will recruit through listservs of health professional organizations (e.g. Society of Obstetricians and Gynaecologists of Canada, Canadian Pediatric Society, Canadian Pharmacists Association, Nurse Practitioner Association of Canada), youth sexual health clinics, sexual and reproductive health organizations (e.g. Action Canada for Sexual Health, Options for Sexual Health), and email listservs for family planning providers (e.g. Canadian Abortion Providers Support Platform). Interested participants will receive the online consent form.

45 Each participant will be offered an honorarium of \$50 for their participation in an interview. We  
46 will collect data until we reach saturation by informational redundancy (new data repeats  
47 previous data) and have sufficient data to explain the phenomenon.(57) To ensure we have a  
48 diverse, information-rich sample, we will seek to saturate each sub-group in our purposeful  
49 sampling framework: rural and urban youth; those in each province and territory; immigrant,  
50  
51  
52  
53  
54  
55  
56  
57

1  
2  
3 refugee, and newcomer youth; disabled youth; Black, Indigenous, and People of Colour (BIPOC);  
4  
5 Two-Spirit, Lesbian, Gay, Bisexual, Transgender, Queer, Questioning, Asexual, Intersex  
6  
7 (2SLGBTQQAI+) youth. Based on analogous studies (35,58) we will likely conduct interviews with  
8  
9 10-15 youth per group, acknowledging that participants will have intersecting identities. We  
10  
11 predict our sample of youth will thus be upwards of 100 total participants.  
12  
13  
14  
15  
16  
17

### 18 **Data collection**

19  
20 Our data collection methods seek to promote confidentiality and build trust, and have been co-  
21  
22 designed with the team's YRAs. We will first invite youth participants to complete an online  
23  
24 enrolment survey using REDCap electronic data capture tools (59,60) hosted at the BC  
25  
26 Children's Hospital Research Institute. This survey will collect demographic data to provide  
27  
28 context on identity characteristics that will assist in our qualitative interpretation, our sex- and  
29  
30 gender+ analysis, and our purposeful sampling. Interested participants will also indicate their  
31  
32 preference for either an in-depth, open-ended 60-minute audio interview by phone or Zoom  
33  
34 software, or to complete a written interview on a confidential study website form. Youth  
35  
36 perceive that asynchronous written interviews by email or website are acceptable, confidential  
37  
38 methods for sharing sensitive reproductive experiences, particularly compared to face-to-face  
39  
40 data collection (58,61) and in a COVID-19 context.(62) Nearly 100% of youth in Canada aged 15  
41  
42 to 30 use the internet daily, a trend observed across all provinces and household income  
43  
44 groups.(63) These ethical and access considerations will be discussed on an ongoing basis with  
45  
46 community groups who are partners in this work. Considerations may include shorter  
47  
48 interviews, in-person interviews, and the inclusion of a third party or social worker to the  
49  
50  
51  
52  
53  
54  
55  
56  
57

1  
2  
3 interview space to better support youth. The youth consent form, demographic information,  
4  
5 and (if applicable) written interview data will be linked automatically through a numeric  
6  
7 participant identification (PID) generated by REDCap.  
8  
9

10 We will conduct in-depth interviews with healthcare professionals to investigate their  
11  
12 perspectives on the accessibility and appropriateness of existing resources and supports for  
13  
14 contraceptive decision-making for youth, and opportunities for improvement. We will collect  
15  
16 and document basic demographic information (postal code, primary specialty, age, gender,  
17  
18 experience prescribing contraception with youth) verbally before the start of healthcare  
19  
20 professional interviews.  
21  
22  
23  
24

25 Each 60-90 minutes audio interview will be conducted by the lead author or an  
26  
27 experienced trainee, with a translator or YRA present if the participant desires language  
28  
29 support. Our topic guides will consist of open-ended questions about access to contraception  
30  
31 and probes to explore the dimensions of Levesque's Access Framework (see Supplementary  
32  
33 Files).(46) This also will include where and how youth would like to access services, including in  
34  
35 pandemic and non-pandemic conditions. We will probe for knowledge and perceptions of  
36  
37 feasibility and acceptability of LARC and youth-led health services. After each interview, we will  
38  
39 provide youth with a list of resources in case they have follow-up questions or interest to access  
40  
41 contraceptive care. Interviews with youth will begin before those with service providers, to  
42  
43 ensure that our theory is grounded first in youth experiences.  
44  
45  
46  
47  
48  
49  
50  
51  
52

### 53 **Data analysis**

54  
55  
56  
57



1  
2  
3 Interview data will be transcribed and/or translated, if applicable, by professional transcription  
4 and translation services. Trainees who conducted the interviews will lead data analysis, with  
5  
6 and translation services. Trainees who conducted the interviews will lead data analysis, with  
7  
8 guidance from the lead author and the YRAs. Our analysis team will independently read and  
9  
10 code a sub-set of transcripts. The coding process has 4 steps: (1) open and *in vivo* coding to  
11  
12 identify properties of emerging concepts, (2) focused coding to identify and organize codes into  
13  
14 batches of similar or related phenomena, (3) comparing data to data (constant comparison),  
15  
16 and (4) theoretical coding to sort, synthesise, and organize the data into major conceptual  
17  
18 categories.(42) We will compare our codebooks and engage in discussion to achieve conceptual  
19  
20 and semantic congruency, and then code another two transcripts to test our merged codebook  
21  
22 to ensure it makes implicit processes and structures visible. Next, using the finalized codebook,  
23  
24 the analysis team will independently code a sub-section of transcripts (each transcript will have  
25  
26 two coders). We will meet weekly to discuss our interpretations and revise the codebook as  
27  
28 needed. Coding will be facilitated by use of NVivo analysis software (version 12).(64) All  
29  
30 qualitative analyses will include consideration of how sex, gender, and other diversity  
31  
32 characteristics influence experiences and attitudes at individual and system levels.(48) To assist  
33  
34 interpretation, we will draw visual maps of those characteristics, relationships, and social worlds  
35  
36 using grounded theory mapping techniques.(65)  
37  
38  
39  
40  
41  
42  
43  
44  
45  
46

### 47 **Verification strategies**

48  
49  
50 Throughout the research, we will pursue verification strategies to ensure reliability and validity,  
51  
52 including constant comparison (comparing open-ended responses and interview data for each  
53  
54 participant, among youth, among healthcare professionals, between samples, and over time),  
55  
56  
57

1  
2  
3 keeping a data trail, and sampling to theoretical sufficiency.(66,67) Our assessment of  
4  
5 *sufficiency* will be guided by the question, “Given the theory, do we have sufficient data to  
6  
7 illustrate it?” To establish *trustworthiness* of the data, each participant will be asked if they  
8  
9 consent to being emailed a password-protected transcript of their interview for member-  
10  
11 checking feedback (i.e., review what they said, edit as needed, and add more information). We  
12  
13 also will write memos throughout to engage in self-reflection, identify gaps in data collection,  
14  
15 and serve as a record of the analytic process.  
16  
17  
18  
19  
20  
21  
22

### 23 **Phase Two: Human-centred design, development, and evaluation of youth stories (Aim 3)**

24  
25 We will use the knowledge generated in Phase One to ideate, prototype, and test ‘youth  
26  
27 stories.’ We anticipate that youth narratives on contraception access will help provider, policy  
28  
29 maker, and patient audiences prioritize, understand, and recall information, and enhance  
30  
31 interest in youth lived experiences.(68–71) Our evaluation will assess the impact of the stories  
32  
33 on audience knowledge (primary outcome) and narrative immersion (e.g. interest, involvement,  
34  
35 empathy), as well as unintended outcomes (persuasion).  
36  
37  
38  
39  
40  
41  
42

### 43 **Method**

44  
45 We will employ user-centered design to develop and evaluate youth stories, a well-established  
46  
47 approach that involves ideation, rapid prototyping, and iterating upon the strengths and  
48  
49 weaknesses of prototypes so that innovations may be designed quickly and with the direct input  
50  
51 and preferences of actual “end-users” of a specific product or service.(72–74) It involves 5 steps:  
52  
53 1) empathize (understanding the way people do things and why), 2) define (expressing the  
54  
55  
56  
57

1  
2  
3 specific problem the intervention will address), 3) ideate (generating solution concepts), 4)  
4  
5 prototype (building models to elicit feedback from colleagues), and 5) test (soliciting feedback  
6  
7 from users).(75) See Figure 2 for an illustration of these steps. We will continue to follow  
8  
9 feminist and standpoint approaches in Phase Two, practicing reflexivity by challenging our  
10  
11 assumptions about the knowledge generated in Phase One, and seeking to be attuned to end-  
12  
13 users' comfort level, differences in power and status, and the effect of gender, race, and age on  
14  
15 the user-centred design process.  
16  
17  
18  
19  
20  
21  
22

23 *[Insert Figure 2. User-centered design process to develop and evaluate youth stories]*  
24  
25  
26  
27

## 28 **Study Population and Recruitment**

29  
30  
31 Our design process will engage the three key audiences for this program of research: youth and  
32  
33 healthcare professionals (as in Phase One), as well as health system decision-makers responsible  
34  
35 for the planning and delivery of contraceptive services. We will send email invitations to the  
36  
37 youth and healthcare professional participants from Phase One, asking if they would be  
38  
39 interested to contribute to a workshop to co-design youth stories. To recruit health system  
40  
41 decision makers (e.g., public health officials, civil servants, and politicians), we will advertise the  
42  
43 study by email invitation through the listservs of the Contraception and Abortion Research  
44  
45 Team, as well as health professional and regulatory organizations in each province and territory,  
46  
47 as in our pilot research.(76) We will conduct the workshops virtually by video conference to  
48  
49 account for national diversity in populations, health service delivery, and access experiences,  
50  
51 and to make it easy and accessible for participants in different regions and time zones.  
52  
53  
54  
55  
56  
57

## Workshop activities

The empathize and define stages will be completed through Phase One interviews. In Phase Two, design thinking workshops will allow us to ideate, prototype, and test and will be co-facilitated by the first author, a trainee, and at least one YRA. The YRAs will have been involved in the Phase One data analysis and will collaborate with the trainees to review the de-identified transcripts and extract stories that best illustrate key themes from Phase One. Each draft prototype will take the format of a 'wireframe' or storyboard to facilitate in-depth feedback. This preliminary work to develop the storyboards will be conducted through an end-of-project team workshop. We will build stories according to the Narrative Immersion Model (NIM)(71,77) using experience and process narratives and evaluating them with end-users prior to dissemination. The NIM model indicates that when the target effect of a narrative is to inform, then *experience narratives* (e.g. what it is like to access contraception) and *process narratives* (e.g. how youth made a contraceptive choice) are appropriate and can mitigate unintended changes in audience attitudes and behaviours.

Then, we will conduct human-centred design workshops to refine prototypes. Workshops will be conducted via Zoom and consist of 1) a short presentation on Phase 1 and the prototype 'storyboards', followed by 2) a moderated discussion to brainstorm and generate ideas, first in breakout rooms and then as a group. The aim is to focus participant ideas towards creation of a series of refined testable prototypes for the youth stories. These decisions will be emergent and co-determined with youth participants. The stories will be composite or aggregate, rather than

1  
2  
3 individual. Combining the stories from a large number of people can assist to both protect  
4  
5 participant anonymity and convey a systemic story, as opposed to a single event or individual  
6  
7 experience.(68) The workshops will be audio-recorded and transcribed by Zoom software to  
8  
9 facilitate iterative revision of the prototypes. After feedback from each session, we will revise  
10  
11 the prototype storyboards.  
12  
13  
14  
15  
16  
17

18 Based on best practices,(78,79) we anticipate to conduct three or more cycles of ideation and  
19  
20 prototyping to generate prototypes that address our KT aims and are satisfactory to all  
21  
22 workshop participants. We plan to hold a total of 10 workshops, including: (i) *at least three*  
23  
24 *workshops each with youth, healthcare professionals, and policy makers involving five*  
25  
26 *participants each*, which our experience has identified is an optimal number for generating  
27  
28 ideation and discussion; and (ii) one synthesis workshop involving all three stakeholder groups  
29  
30 and led by the YRAs to generate shared meaning and ensure the final prototypes are inclusive  
31  
32 and reflect youth voices.  
33  
34  
35  
36  
37  
38  
39  
40

## 41 **Evaluation**

42  
43 Using the same recruitment strategies as in Phase One, we will recruit health system decision  
44  
45 makers, healthcare professionals, and youth who are naïve to the study design. The evaluation  
46  
47 will be completed via online survey (RedCap). We will ask participants to complete a  
48  
49 demographic questionnaire and a knowledge pre-test involving 5 statements about  
50  
51 contraception access, each scored on a 5-item Likert scale ranging from strongly agree to  
52  
53 strongly disagree. Participants will be presented with the suite of stories to review and will  
54  
55  
56  
57

1  
2  
3 complete a post-test. The post-test will include the same 5-item knowledge test used in the pre-  
4  
5 test and a single-item question with a yes/no response: “Did reading the stories give you  
6  
7 information about contraception access that you did not have before?”  
8  
9

10  
11  
12  
13 After completing these tasks, participants will complete a qualitative survey investigating  
14  
15 perceptions of other elements of the Narrative Immersion Model (e.g. interest, involvement,  
16  
17 immersion) and unintended outcomes (e.g. persuasion).(71) We will measure change in  
18  
19 knowledge by comparing pre- and post-test scores from the 5-item knowledge test (non-  
20  
21 parametric Wilcoxon signed rank test).(80) Statistical significance will be denoted as  $p \leq 0.05$ .  
22  
23 We will report qualitative responses using reflexive thematic analysis, stratified by audience  
24  
25 type.(81–83) We will evaluate the reach of youth stories and study website performance  
26  
27 through Google analytics, unique website visitors, view count, engagement (watch time per  
28  
29 view), video shares and (dis)likes, and hashtag tracking. We will report data descriptively.  
30  
31  
32  
33  
34  
35  
36  
37

38 Following evaluation, we will produce final versions of the youth stories. Based on best  
39  
40 practices,(84) these may consist of 2-minute whiteboard and/or live videos of patient stories or  
41  
42 text-based infographics, as well as evidence briefs for policy makers. The methods will be  
43  
44 determined through the design workshops we complete in Phase Two.  
45  
46  
47  
48  
49

## 50 **Patient and Public Involvement**

51  
52 The research question and study design were co-developed with patient partners from the UBC  
53  
54 Youth Research Advisory Panel (Y-RAP) through a series of workshop meetings. As described  
55  
56  
57

1  
2  
3 above, Youth Research Associates (patient partners) are full members of the research team,  
4  
5 guiding all study decisions and engaging in recruitment, data collection, and analysis and  
6  
7 dissemination of youth stories.  
8  
9

## 12 **Discussion**

13  
14  
15 Our research will generate evidence on the contraception access needs of youth in Canada. Our  
16  
17 project has the potential to inform Canadian contraceptive policy and practice to mitigate youth  
18  
19 access barriers; improve contraception access for youth; and ultimately, reduce rates of  
20  
21 unintended pregnancy and need for abortion among youth. To accelerate the impact of our  
22  
23 research, we will translate the knowledge generated through this project into tangible KT tools  
24  
25 in partnership with knowledge users through an inclusive design process.  
26  
27  
28  
29  
30  
31

## 32 **Acknowledgements**

33  
34  
35 Thank you to members of the Contraception and Abortion Research Team (CART-GRAC) for  
36  
37 providing their expert feedback in preparing this study. Thank you to the youth advisors who  
38  
39 collaborated to generate the questions and approaches for this study.  
40  
41  
42  
43  
44

## 45 **Authors' contributions**

46  
47 SM and GDM developed the study concept and approach with input from all coauthors. SM and  
48  
49 AW wrote the first draft of the manuscript. KJ, ZK, HS, and WVN significantly contributed to the  
50  
51 design. All authors contributed to manuscript revisions and reviewed and approved the final  
52  
53 manuscript.  
54  
55  
56  
57

### **Funding statement**

This study is funded through a Project Grant from the Canadian Institutes for Health Research (CIHR) (180633). SM is supported by a Michael Smith Health Research BC Scholar Award (18270). WVN is supported by the UBC Department of Family Practice and CIHR and the Public Health Agency of Canada with a Chair in Family Planning Public Health Research (2014-2024, CPP-329455-107837).

### **Competing Interests**

GDM is a member of the Adolescent Health Committee, Canadian Paediatric Society, and lead author of the policy statement advocating for universal no-cost access to contraception published by the Canadian Paediatric Society. AB has received Advisory Board consulting fees from Organon, Bayer, Mithra, as well as honoraria for lectures and presentations from Bayer, Organon, and Searchlight. AB is also President-Elect and Director of the Board for the Society of Obstetricians and Gynecologists of Canada. ZK is a Board Member with Options for Sexual Health. MF is employed by Options for Sexual Health.

### **Ethics and dissemination**

Ethical approval for this study has been provided by the UBC Behavioural Research Ethics Board (H21-01091). Results will be published in peer-reviewed journal publications. Due to the sensitive nature of the research and ethical restrictions to protect the privacy of research participants, the qualitative dataset will not be publicly available. The participants of this study will not provide written consent for their transcript data to be shared publicly.



## References

1. World Health Organization. Sexual and reproductive health and rights: infographic snapshot [Internet]. 2022 Apr. Report No.: WHO/SRH/21.21. Available from: <https://www.who.int/publications/i/item/WHO-SRH-21.21>
2. Todd N, Black A. Contraception for Adolescents. *J Clin Res Pediatr Endocrinol*. 2020 Jan;12(Suppl 1):28–40.
3. Di Meglio G, Yorke E. Universal access to no-cost contraception for youth in Canada. *Paediatr Child Health*. 2019 May 15;24(3):160–4.
4. Nethery E, Schummers L, Maginley KS, Dunn S, Norman WV. Household income and contraceptive methods among female youth: a cross-sectional study using the Canadian Community Health Survey (2009–2010 and 2013–2014). *CMAJ Open*. 2019 Jan 10;7(4):E646–53.
5. Ross L, Solinger R. *Reproductive justice: An introduction*. Vol. 1. Univ of California Press; 2017.
6. Black A, Yang Q, Wu Wen S, Lalonde AB, Guilbert E, Fisher W. Contraceptive use among Canadian women of reproductive age: results of a national survey. *J Obstet Gynaecol Can JOGC J Obstet Gynecol Can JOGC*. 2009 Jul;31(7):627–40.
7. Black A, Guilbert E, Costescu D, Dunn S, Fisher W, Kives S, et al. Canadian Contraception Consensus (Part 3 of 4): Chapter 7 – Intrauterine Contraception. *J Obstet Gynaecol Can*. 2016 Feb 1;38(2):182–222.
8. Black A, Guilbert E, Co-Authors, Costescu D, Dunn S, Fisher W, et al. Canadian Contraception Consensus (Part 1 of 4). *J Obstet Gynaecol Can JOGC J Obstétrique Gynécologie Can JOGC*. 2015 Oct;37(10):936–42.
9. Di Meglio G, Crowther C, Simms J. Contraceptive care for Canadian youth. *Paediatr Child Health*. 2018 Jun 12;23(4):271–7.
10. Arnett JJ. *Emerging adulthood: The winding road from the late teens through the twenties*. New York: Oxford University Press; 2004.
11. Aiken ARA, Borrero S, Callegari LS, Dehlendorf C. Rethinking the Pregnancy Planning Paradigm: Unintended Conceptions or Unrepresentative Concepts? *Perspect Sex Reprod Health*. 2016 Sep;48(3):147–51.
12. Di Meglio G, Yeates J, Seidman G. Can youth get the contraception they want? Results of a pilot study in the province of Quebec. *Paediatr Child Health*. 2020 Apr 10;25(3):160–5.
13. Motluk A. Birth control often not covered by Canadian insurers. *CMAJ Can Med Assoc J*. 2016 Oct 4;188(14):1001–2.

14. Dehlendorf C, Akers AY, Borrero S, Callegari LS, Cadena D, Gomez AM, et al. Evolving the Preconception Health Framework. *Obstet Gynecol*. 2021 Feb;137(2):234–9.
15. Hulme J, Dunn S, Guilbert E, Soon J, Norman W. Barriers and facilitators to family planning access in Canada: Stakeholder input on implications for health system and policy reform. *Healthc Policy Polit Santé*. 2015 Feb;10(3):48–63.
16. Salehi R, Hynie M, Flicker S. Factors Associated with Access to Sexual Health Services Among Teens in Toronto: Does Immigration Matter? *J Immigr Minor Health*. 2014 Aug 1;16(4):638–45.
17. Shoveller J, Chabot C, Soon JA, Levine M. Identifying Barriers to Emergency Contraception Use Among Young Women from Various Sociocultural Groups in British Columbia, Canada. *Perspect Sex Reprod Health*. 2007;39(1):13–20.
18. Kavanaugh ML, Jerman J. Contraceptive method use in the United States: trends and characteristics between 2008, 2012 and 2014. *Contraception*. 2018;97(1):14–21.
19. Coles MS, Makino KK, Stanwood NL. Contraceptive experiences among adolescents who experience unintended birth. *Contraception*. 2011;84(6):578–84.
20. Brittain AW, Loyola Briceno AC, Pazol K, Zapata LB, Decker E, Rollison JM, et al. Youth-Friendly Family Planning Services for Young People: A Systematic Review Update. *Am J Prev Med*. 2018 Nov;55(5):725–35.
21. Brown MK, Auerswald C, Eyre SL, Deardorff J, Dehlendorf C. Identifying Counseling Needs of Nulliparous Adolescent Intrauterine Contraceptive Users: A Qualitative Approach. *J Adolesc Health*. 2013 Mar 1;52(3):293–300.
22. Jones RK, Biddlecom AE. The more things change...: the relative importance of the internet as a source of contraceptive information for teens. *Sex Res Soc Policy*. 2011;8(1):27–37.
23. Jones RK, Boonstra H. Confidential reproductive health services for minors: the potential impact of mandated parental involvement for contraception. *Perspect Sex Reprod Health*. 2004;36(5):182–91.
24. Kittur ND, Secura GM, Peipert JF, Madden T, Finer LB, Allsworth JE. Comparison of contraceptive use between the Contraceptive CHOICE Project and state and national data. *Contraception*. 2011;83(5):479–85.
25. Melo J, Peters M, Teal S, Guiahi M. Adolescent and Young Women’s Contraceptive Decision-Making Processes: Choosing “The Best Method for Her.” *J Pediatr Adolesc Gynecol*. 2015 Aug 1;28(4):224–8.
26. Hoopes AJ, Gilmore K, Cady J, Akers AY, Ahrens KR. A Qualitative Study of Factors That Influence Contraceptive Choice among Adolescent School-Based Health Center Patients. *J Pediatr Adolesc Gynecol*. 2016 Jun;29(3):259–64.
27. Lewis R, Blake C, Shimonovich M, Coia N, Duffy J, Kerr Y, et al. Disrupted prevention: condom and contraception access and use among young adults during the initial months of the COVID-19 pandemic. An online survey. *BMJ Sex Reprod Health*. 2021 Oct 1;47(4):269–76.

- 1  
2  
3 28. Bitzer J, Abalos V, Apter D, Martin R, Black A, Global CARE (Contraception: Access, Resources,  
4 Education) Group. Targeting factors for change: contraceptive counselling and care of female  
5 adolescents. *Eur J Contracept Reprod Health Care Off J Eur Soc Contracept*. 2016 Dec;21(6):417–30.  
6  
7 29. Geary RS, Tomes C, Jones KG, Glasier A, Macdowall W, Datta J, et al. Actual and preferred  
8 contraceptive sources among young people: findings from the British National Survey of Sexual  
9 Attitudes and Lifestyles. *BMJ Open*. 2016 Sep 1;6(9):e011966.  
10  
11 30. Craig AD, Dehlendorf C, Borrero S, Harper CC, Rocca CH. Exploring young adults' contraceptive  
12 knowledge and attitudes: disparities by race/ethnicity and age. *Womens Health Issues Off Publ  
13 Jacobs Inst Womens Health*. 2014 Jun;24(3):e281-289.  
14  
15 31. Bowen S, Graham ID. Integrated knowledge translation. In: Straus SE, Tetroe J, Graham ID, editors.  
16 Knowledge Translation in Health Care [Internet]. John Wiley & Sons, Ltd; 2013 [cited 2016 Mar 12].  
17 p. 14–23. Available from:  
18 <http://onlinelibrary.wiley.com.ezproxy.library.ubc.ca/doi/10.1002/9781118413555.ch02/summary>  
19  
20 32. Canadian Institutes of Health Research. Guide to knowledge translation planning at CIHR: integrated  
21 and end-of-grant approaches. Canadian Institutes of Health Research; 2012.  
22  
23 33. Norman W, Munro S, Brooks M, Devane C, Guilbert E, Renner R, et al. Could implementation of  
24 mifepristone address Canada's urban-rural abortion access disparity: a mixed methods  
25 implementation study protocol. *BMJ Open*. 2019;9:e028443.  
26  
27 34. Munro S, Wahl K, Soon JA, Guilbert E, Wilcox ES, Leduc-Robert G, et al. Pharmacist dispensing of the  
28 abortion pill in Canada: Diffusion of Innovation meets integrated knowledge translation. *Implement  
29 Sci*. 2021 Aug 3;16(1):76.  
30  
31 35. Munro S, Guilbert E, Wagner MS, Wilcox ES, Devane C, Dunn S, et al. Perspectives Among Canadian  
32 Physicians on Factors Influencing Implementation of Mifepristone Medical Abortion: A National  
33 Qualitative Study. *Ann Fam Med*. 2020 Sep 1;18(5):413–21.  
34  
35 36. Dineley B, Munro S, Norman WV. Leadership for success in transforming medical abortion policy in  
36 Canada. *PLOS ONE*. 2020 Jan 8;15(1):e0227216.  
37  
38 37. Guilbert E, Wagner MS, Munro S, Wilcox ES, Dunn S, Soon JA, et al. Slow implementation of  
39 mifepristone medical termination of pregnancy in Quebec, Canada: a qualitative investigation. *Eur J  
40 Contracept Reprod Health Care Off J Eur Soc Contracept*. 2020 Jun;25(3):190–8.  
41  
42 38. Wagner MS, Munro S, Wilcox ES, Devane C, Norman WV, Dunn S, et al. Barriers and Facilitators to  
43 the Implementation of First Trimester Medical Abortion With Mifepristone in the Province of  
44 Québec: A Qualitative Investigation. *J Obstet Gynaecol Can*. 2020 May 1;42(5):576–82.  
45  
46 39. Kothari A, MacLean L, Edwards N. Increasing capacity for knowledge translation: understanding how  
47 some researchers engage policy makers. *Evid Policy*. 2009;5(1):33–51.  
48  
49 40. Lawrence LM, Curran AB and J. Integrated Knowledge Translation with Public Health Policy Makers:  
50 A Scoping Review [Internet]. *Healthcare Policy*. 2019 [cited 2019 Apr 23]. Available from:  
51 <https://www.longwoods.com/content/25792/healthcare-policy/integrated-knowledge-translation->  
52  
53  
54  
55  
56  
57

with-public-health-policy-makers-a-scoping-review?utm\_source=Healthcare+Policy+TOC+Alert&utm\_campaign=e7423b8cba-TOC+Alert+-HPol+Vol.+14+No.+3&utm\_medium=email&utm\_term=0\_fce19ffccc-e7423b8cba-48565577

41. Lavis JN, Robertson D, Woodside JM, McLeod CB, Abelson J, Group KTS. How can research organizations more effectively transfer research knowledge to decision makers? *Milbank Q.* 2003;81(2):221–48, 171–2.
42. Charmaz K. *Constructing Grounded Theory: A Practical Guide through Qualitative Analysis* (Introducing Qualitative Methods series). London: Sage; 2006.
43. Charmaz K. “With Constructivist Grounded Theory You Can’t Hide”: Social Justice Research and Critical Inquiry in the Public Sphere. *Qual Inq.* 2020 Feb 1;26(2):165–76.
44. Harding S, Norberg K. New feminist approaches to social science methodologies: An introduction. *Signs J Women Cult Soc.* 2005;30(4):2009–15.
45. Harding SG. *The feminist standpoint theory reader: Intellectual and political controversies.* Psychology Press; 2004.
46. Levesque JF, Harris MF, Russell G. Patient-centred access to health care: conceptualising access at the interface of health systems and populations. *Int J Equity Health.* 2013;12(1):18.
47. Heidari S, Babor TF, De Castro P, Tort S, Curno M. Sex and Gender Equity in Research: rationale for the SAGER guidelines and recommended use. *Res Integr Peer Rev.* 2016 May 3;1(1):2.
48. Day S, Mason R, Lagosky S, Rochon PA. Integrating and evaluating sex and gender in health research. *Health Res Policy Syst.* 2016 Oct 10;14(1):75.
49. Government of Canada CI of HR. Sex, Gender and Knowledge Translation - CIHR [Internet]. 2016 [cited 2019 Sep 24]. Available from: <http://www.cihr-irsc.gc.ca/e/49933.html>
50. Hankivsky O, Springer KW, Hunting G. Beyond sex and gender difference in funding and reporting of health research. *Res Integr Peer Rev.* 2018 Aug 28;3(1):6.
51. Government of Ontario M of H and LTC. OHIP+: Children and Youth Pharmacare - Drugs and Devices - Health Care Professionals - MOH [Internet]. Government of Ontario, Ministry of Health and Long-Term Care; [cited 2022 Oct 11]. Available from: <https://www.health.gov.on.ca/en/pro/programs/drugs/ohipplus/>
52. Dunn S, Xiong AQ, Nuernberger K, Norman WV. Non-use of Contraception by Canadian Youth Aged 15 to 24: Findings From the 2009-2010 Canadian Community Health Survey. *J Obstet Gynaecol Can JOGC J Obstet Gynecol Can JOGC.* 2019 Jan;41(1):29–37.
53. Schiller C, Winters M, Hanson HM, Ashe MC. A framework for stakeholder identification in concept mapping and health research: a novel process and its application to older adult mobility and the built environment. *BMC Public Health.* 2013 May 2;13:428.

- 1
- 2
- 3 54. Black K, McBean E. Increased Indigenous participation in environmental decision-making: A policy
- 4 analysis for the improvement of Indigenous health. *Int Indig Policy J*. 2016;7(4).
- 5
- 6 55. Balane MA, Palafox B, Palileo-Villanueva LM, McKee M, Balabanova D. Enhancing the use of
- 7 stakeholder analysis for policy implementation research: towards a novel framing and
- 8 operationalised measures. *BMJ Glob Health*. 2020 Nov 1;5(11):e002661.
- 9
- 10 56. Reed MS, Graves A, Dandy N, Posthumus H, Hubacek K, Morris J, et al. Who's in and why? A typology
- 11 of stakeholder analysis methods for natural resource management. *J Environ Manage*. 2009 Apr
- 12 1;90(5):1933–49.
- 13
- 14 57. Saunders B, Sim J, Kingstone T, Baker S, Waterfield J, Bartlam B, et al. Saturation in qualitative
- 15 research: exploring its conceptualization and operationalization. *Qual Quant*. 2017 Sep 14;1–15.
- 16
- 17 58. Vogel KI, LaRoche KJ, El-Haddad J, Chaumont A, Foster AM. Exploring Canadian women's knowledge
- 18 of and interest in mifepristone: results from a national qualitative study with abortion patients.
- 19 *Contraception*. 2016 Aug 1;94(2):137–42.
- 20
- 21 59. Harris PA, Taylor R, Thielke R, Payne J, Gonzalez N, Conde JG. Research electronic data capture
- 22 (REDCap)--a metadata-driven methodology and workflow process for providing translational
- 23 research informatics support. *J Biomed Inform*. 2009 Apr;42(2):377–81.
- 24
- 25 60. Harris PA, Taylor R, Minor BL, Elliott V, Fernandez M, O'Neal L, et al. The REDCap consortium:
- 26 Building an international community of software platform partners. *J Biomed Inform*. 2019
- 27 Jul;95:103208.
- 28
- 29 61. Rodriguez L. Methodological challenges of sensitive topic research with adolescents. *Qual Res J*.
- 30 2018 Jan 1;18(1):22–32.
- 31
- 32 62. Lupton D. Social Research for a COVID and Post-COVID World: An Initial Agenda [Internet]. Medium.
- 33 2020 [cited 2020 May 25]. Available from: [https://medium.com/@deborahalupton/social-research-](https://medium.com/@deborahalupton/social-research-for-a-covid-and-post-covid-world-an-initial-agenda-796868f1fb0e)
- 34 [for-a-covid-and-post-covid-world-an-initial-agenda-796868f1fb0e](https://medium.com/@deborahalupton/social-research-for-a-covid-and-post-covid-world-an-initial-agenda-796868f1fb0e)
- 35
- 36 63. Statistics Canada. A Portrait of Canadian Youth [Internet]. 2019 Mar. (A Presentation Series from
- 37 Statistics Canada About the Economy, Environment and Society). Available from:
- 38 <https://www150.statcan.gc.ca/n1/pub/11-631-x/11-631-x2019003-eng.pdf>
- 39
- 40 64. Jackson K, Bazeley P. *Qualitative data analysis with NVivo*. Sage; 2019.
- 41
- 42 65. Clarke AE. Situational Analyses: Grounded Theory Mapping After the Postmodern Turn. *Symb*
- 43 *Interact*. 2003 Nov 1;26(4):553–76.
- 44
- 45 66. Morse JM, Barrett M, Mayan M, Olson K, Spiers J. Verification Strategies for Establishing Reliability
- 46 and Validity in Qualitative Research. *Int J Qual Methods*. 2008 Dec 19;1(2):13–22.
- 47
- 48 67. Morse JM. Critical Analysis of Strategies for Determining Rigor in Qualitative Inquiry. *Qual Health*
- 49 *Res*. 2015 Sep 1;25(9):1212–22.
- 50
- 51
- 52
- 53
- 54
- 55
- 56
- 57

- 1  
2  
3 68. Fadlallah R, El-Jardali F, Nomier M, Hemadi N, Arif K, Langlois EV, et al. Using narratives to impact  
4 health policy-making: a systematic review. *Health Res Policy Syst.* 2019 Mar 5;17(1):26.  
5  
6 69. Epstein D, Farina C, Heidt J. The value of words: Narrative as evidence in policy making. *Evid Policy J*  
7 *Res Debate Pract.* 2014;10(2):243–58.  
8  
9 70. Shaffer VA, Brodney S, Gavaruzzi T, Zisman-Ilani Y, Munro S, Smith SK, et al. Do Personal Stories  
10 Make Patient Decision Aids More Effective? An Update from the International Patient Decision Aids  
11 Standards. *Med Decis Making.* 2021 Oct 1;41(7):897–906.  
12  
13 71. Shaffer VA, Focella ES, Hathaway A, Scherer LD, Zikmund-Fisher BJ. On the Usefulness of Narratives:  
14 An Interdisciplinary Review and Theoretical Model. *Ann Behav Med.* 2018 Apr 19;52(5):429–42.  
15  
16 72. Roberts JP, Fisher TR, Trowbridge MJ, Bent C. A design thinking framework for healthcare  
17 management and innovation. *Healthcare.* 2016 Mar 1;4(1):11–4.  
18  
19 73. Kelly T. The art of innovation. *Profile Bus.* 2002;  
20  
21 74. Chen E, Leos C, Kowitt SD, Moracco KE. Enhancing Community-Based Participatory Research Through  
22 Human-Centered Design Strategies. *Health Promot Pract.* 2020 Jan 1;21(1):37–48.  
23  
24 75. Hasso Plattner Institute of Design at Stanford. An introduction to design thinking process guide.  
25 Stanford University Palo Alto, CA; 2010.  
26  
27 76. Munro S. Knowledge Translation and Policy Impacts: How Do We Help Stakeholders Make Evidence-  
28 Based Decisions? Invited presented at: Canadian Knowledge Mobilization Forum, Virtual meeting;  
29 2020 Nov 24; Canada.  
30  
31 77. Shaffer VA, Zikmund-Fisher BJ. All Stories Are Not Alike A Purpose-, Content-, and Valence-Based  
32 Taxonomy of Patient Narratives in Decision Aids. *Med Decis Making.* 2013 Jan 1;33(1):4–13.  
33  
34 78. Vaisson G, Provencher T, Dugas M, Trottier MÈ, Chipenda Dansokho S, Colquhoun H, et al. User  
35 Involvement in the Design and Development of Patient Decision Aids and Other Personal Health  
36 Tools: A Systematic Review. *Med Decis Making.* 2021 Apr 1;41(3):261–74.  
37  
38 79. Witteman HO, Dansokho SC, Colquhoun H, Coulter A, Dugas M, Fagerlin A, et al. User-centered  
39 design and the development of patient decision aids: protocol for a systematic review. *Syst Rev.*  
40 2015;4:11.  
41  
42 80. Field AP. *Discovering Statistics Using SPSS for Windows: Advanced Techniques for Beginners.* 1st ed.  
43 Thousand Oaks, CA, USA: Sage Publications, Inc.; 2000.  
44  
45 81. Braun V, Clarke V. Reflecting on reflexive thematic analysis. *Qual Res Sport Exerc Health.* 2019 Aug  
46 8;11(4):589–97.  
47  
48 82. Braun V, Clarke V. *Thematic analysis: A practical guide.* Sage; 2021.  
49  
50 83. Braun V, Clarke V. One size fits all? What counts as quality practice in (reflexive) thematic analysis?  
51 *Qual Res Psychol.* 2020 Aug 12;0(0):1–25.  
52  
53  
54  
55  
56  
57

1  
2  
3  
4  
5  
6  
7  
8  
9  
10  
11  
12  
13  
14  
15  
16  
17  
18  
19  
20  
21  
22  
23  
24  
25  
26  
27  
28  
29  
30  
31  
32  
33  
34  
35  
36  
37  
38  
39  
40  
41  
42  
43  
44  
45  
46  
47  
48  
49  
50  
51  
52  
53  
54  
55  
56  
57  
58  
59  
60

84. Gagliardi AR, Légaré F, Brouwers MC, Webster F, Badley E, Straus S. Patient-mediated knowledge translation (PKT) interventions for clinical encounters: a systematic review. *Implement Sci.* 2016;11:26.

For peer review only



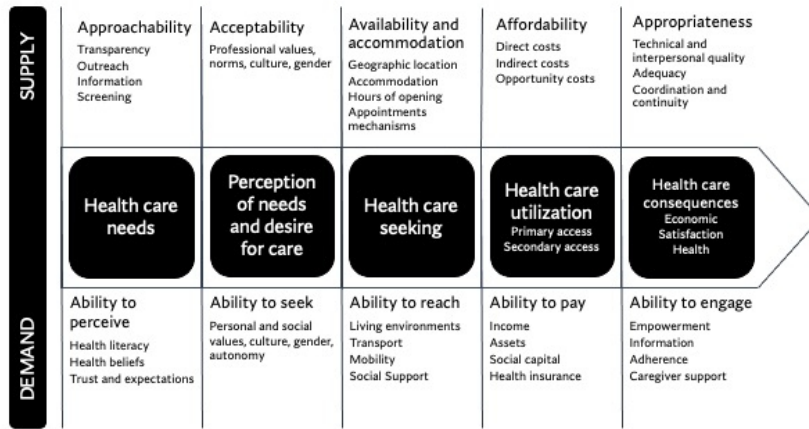

A conceptual framework of access to care, adapted from Levesque

338x190mm (54 x 54 DPI)



1  
2  
3  
4  
5  
6  
7  
8  
9  
10  
11  
12  
13  
14  
15  
16  
17  
18  
19  
20  
21  
22  
23  
24  
25  
26  
27  
28  
29  
30  
31  
32  
33  
34  
35  
36  
37  
38  
39  
40  
41  
42  
43  
44  
45  
46  
47  
48  
49  
50  
51  
52  
53  
54  
55  
56  
57  
58  
59  
60

|                                                                                   |                                                                                   |                                                                                   |                                                                                      |                                                                                     |
|-----------------------------------------------------------------------------------|-----------------------------------------------------------------------------------|-----------------------------------------------------------------------------------|--------------------------------------------------------------------------------------|-------------------------------------------------------------------------------------|
|  |  |  |     |  |
| <b>Empathize</b><br>Understanding the way youth access contraception              | <b>Define</b><br>Expressing the specific problem the KT products will address     | <b>Ideate</b><br>Generating solution concepts for how to present youth stories    | <b>Prototype</b><br>Building KT products to elicit feedback from youth and providers | <b>Test</b><br>Soliciting feedback from youth and providers                         |

User-centered design process to develop and evaluate youth stories

338x190mm (54 x 54 DPI)

## Youth Access to Contraception

**Interview Guide for Youth**

*[Interviewers may begin by identifying themselves: who they are and their role in the study. The questions below are a guide and will be adapted in real-time for an organic conversation. The recording will begin after introductions]*

**Introduction to participant**

Thank you so much for agreeing to participate in the project. Our conversation today is part of this 4-year grant-funded study. Our goal is to understand youth experiences of access to contraception in Canada. Through this project our aim is to listen to stories and make recommendations for models of contraception care that are youth-appropriate, empowering, and accessible. Before we review your consent form, do you have any questions for me?

Before we begin the interview, I would like to review the consent form with you and answer any questions about the form or the study itself that you may have. If you don't mind, please pull up the consent form that our research coordinator shared with you by email and read through once more. Once you've done that, you can let me know if you consent to participate in today's interview, then we'll begin.

**\*Instructions for interviewers\***

- *Provide a summary of the consent form.*
- *Participant reviews the consent form then provides their verbal consent to participate before continuing.*
- *Confirm that participants have had a chance to review the interview guide (table).*
- *Interviewers may begin by identifying themselves: who they are, where they are from, and their social position in relation to the study.*
- *The recording will begin after introductions. **Start recording.***

|   | Question                                                                             | Optional follow-up questions                                                                                                                                                                                                                     |
|---|--------------------------------------------------------------------------------------|--------------------------------------------------------------------------------------------------------------------------------------------------------------------------------------------------------------------------------------------------|
|   | Experiences of providing care                                                        |                                                                                                                                                                                                                                                  |
| 1 | Can you tell me a little bit about your experiences of accessing contraception care? | I'd like to learn more about <i>[the experiences the participant described]</i> . Can you tell me step by step what that looked like? Paint me a picture, if you can. <i>[Repeat the question to learn about other experiences, if relevant]</i> |
| 2 | What (other) methods have you used? What do you like most/least about those methods? | Do you use these methods for any reason other than birth control? If yes, what do you like about those methods?                                                                                                                                  |

Youth Access to Contraception

|    |                                                                                                                                                                                                                         |                                                                                                                                                                                                                                                                               |
|----|-------------------------------------------------------------------------------------------------------------------------------------------------------------------------------------------------------------------------|-------------------------------------------------------------------------------------------------------------------------------------------------------------------------------------------------------------------------------------------------------------------------------|
|    | Availability and accommodation                                                                                                                                                                                          |                                                                                                                                                                                                                                                                               |
| 3  | Did you feel that all contraception methods were options for you? If not, why not? How did this impact your decision?                                                                                                   |                                                                                                                                                                                                                                                                               |
| 4  | What is easy/hard about accessing your preferred method? What is easy/hard about accessing other methods?                                                                                                               |                                                                                                                                                                                                                                                                               |
| 5  | What contraception services are available in your community that you are aware of?                                                                                                                                      | Do people have to leave the community to access care? If so, where to and how do they get there?                                                                                                                                                                              |
| 6  | In your view, how welcoming are the spaces to youth? What are some of the things that make the spaces more or less welcoming?                                                                                           |                                                                                                                                                                                                                                                                               |
| 7  | If you or a relative needed information about options for preventing a pregnancy, is there a safe, knowledgeable person or place in your community to go to? Who or where would this be?                                | <i>[Probe about a person, an organization, a resource]</i><br>Do you feel as knowledgeable as you'd like to be about options for birth control? What are some strategies that you think would work well for increasing awareness about options for birth control among youth? |
|    | Approachability and affordability                                                                                                                                                                                       |                                                                                                                                                                                                                                                                               |
| 8  | Do you feel that all contraception methods are options for you?                                                                                                                                                         | If no, why not?<br>If yes, what would make it possible?                                                                                                                                                                                                                       |
| 9  | Thinking about the contraception experiences you have mentioned so far, what are the costs that you have experienced?                                                                                                   | <i>Probe for costs that were covered by a benefits plan, out of pocket for prescriptions, out of pocket for travel, and any indirect financial impact on loss of work, childcare expenses, etc</i>                                                                            |
| 10 | Was there ever a situation where you needed to access contraception care and challenges related to costs, health benefits, or provider availability impacted or delayed you from getting services when you needed them? | If yes ->, Can you tell us about that?                                                                                                                                                                                                                                        |
| 11 | In general, how do you see these barriers impacting youth's access to care?                                                                                                                                             | What would make it easier for you to reach contraception care?                                                                                                                                                                                                                |
|    | Acceptability (i.e. Culturally safe care)                                                                                                                                                                               |                                                                                                                                                                                                                                                                               |

## Youth Access to Contraception

|                                                 |                                                                                                                                                                                                    |                                                                                                                                                                                                                                                                                                                                                                                                                                                                                                                                     |
|-------------------------------------------------|----------------------------------------------------------------------------------------------------------------------------------------------------------------------------------------------------|-------------------------------------------------------------------------------------------------------------------------------------------------------------------------------------------------------------------------------------------------------------------------------------------------------------------------------------------------------------------------------------------------------------------------------------------------------------------------------------------------------------------------------------|
| 12                                              | What does “culturally appropriate” or “culturally safe” care mean to you in the case of contraception?                                                                                             | Have you ever had an experience of accessing contraception care that you would characterize as culturally safe? What made it so? Have you ever had an experience of accessing contraception care that you would characterize as culturally <b>unsafe</b> ? What made it so?                                                                                                                                                                                                                                                         |
| 13                                              | Have you ever avoided getting contraception care because you felt it wouldn't be culturally safe? Please tell me more about that experience.                                                       | If bringing culture into your contraception care experience is important to you, what would you need from the health care system to be able to do it safely and accessibly?                                                                                                                                                                                                                                                                                                                                                         |
| 14                                              | What are the things that give you a feeling of trust with your health care provider when talking about contraception?                                                                              |                                                                                                                                                                                                                                                                                                                                                                                                                                                                                                                                     |
| Shared decision making                          |                                                                                                                                                                                                    |                                                                                                                                                                                                                                                                                                                                                                                                                                                                                                                                     |
| 14                                              | Tell me how you made the decision to use your current method. What were the factors that went into your decision?                                                                                  | <ul style="list-style-type: none"> <li>• Tell me how you made the decision to use your current method. What were the factors that went into your decision?</li> <li>• What information did you use to help make your decision?</li> <li>• What was most helpful to you in making your decision?<br/><i>[Probe about a person, an organization, a resource and healthcare providers]</i></li> <li>• How did you feel about your decision when you made it? Did you feel certain? How do you feel about your decision now?</li> </ul> |
| 15                                              | Tell us how family members are involved when you're making choices about contraception. How are your partner/s involved in those choices? How is your broader community involved in those choices? | <ul style="list-style-type: none"> <li>• We are curious to know about any resistance to contraception care in the community, for religious or cultural reasons. How do people around you feel about family planning services?</li> <li>• Tell me about other people and their role in your contraception choices. Who else, if anyone, influences your choice about method? Tell me about how he/she/they influenced you.</li> </ul>                                                                                                |
| Appropriateness (of health services and system) |                                                                                                                                                                                                    |                                                                                                                                                                                                                                                                                                                                                                                                                                                                                                                                     |
| 16                                              | What community-run, youth health services are available to you in general, for any health services? What about contraception/family planning care?                                                 |                                                                                                                                                                                                                                                                                                                                                                                                                                                                                                                                     |

Youth Access to Contraception

|                  |                                                                                                                                |                                                                                                                                                                   |
|------------------|--------------------------------------------------------------------------------------------------------------------------------|-------------------------------------------------------------------------------------------------------------------------------------------------------------------|
| 17               | Ideally, where would you like to receive family planning care?                                                                 | <i>Supplementary question if clarification needed: What existing clinic feels like the place you would be most comfortable to access contraception care? Why?</i> |
| 18               | Ideally, who or which health care provider would be the most comfortable person for you to access contraception care?          | <i>Probe also for midwives, allied health professionals, community health workers, patient navigators, doulas</i>                                                 |
| Ending questions |                                                                                                                                |                                                                                                                                                                   |
| 19               | If you could wave a magic wand and change the health system, what would it look like for youth trying to access contraception? |                                                                                                                                                                   |
| 20               | Is there anything that you might not have thought about before that occurred to you during this interview?                     | What do you like about them?                                                                                                                                      |
| 21               | Is there anything else you think I should know to better understand how contraception access could be improved?                |                                                                                                                                                                   |
| 22               | Finally, what motivated you to participate in the study?                                                                       |                                                                                                                                                                   |

That concludes the interview. I encourage you to check out the resources listed on your consent form, if you're keen to learn about the confidential and free sexual and reproductive health and mental health supports available to you.

Do you have any questions for me?

## Youth Access to Contraception

**Interview Guide for Health Care Providers**

*[Interviewers may begin by identifying themselves: who they are and their role in the study. The questions below are a guide and will be adapted in real-time for an organic conversation. The recording will begin after introductions]*

**Introduction to participant**

Thank you so much for agreeing to participate in the project. Our conversation today is part of this 4-year grant-funded study. Our goal is to understand youth experiences of access to contraception in Canada. Through this project our aim is to listen to stories and make recommendations for models of contraception care that are youth-appropriate, empowering, and accessible. Before we review your consent form, do you have any questions for me?

Before we begin the interview, I would like to review the consent form with you and answer any questions about the form or the study itself that you may have. If you don't mind, please pull up the consent form that our research coordinator shared with you by email and read through once more. Once you've done that, you can let me know if you consent to participate in today's interview, then we'll begin.

**\*Instructions for interviewers\***

- *Provide a summary of the consent form.*
- *Participant reviews the consent form then provides their verbal consent to participate before continuing.*
- *Confirm that participants have had a chance to review the interview guide (table).*
- *Interviewers may begin by identifying themselves: who they are, where they are from, and their social position in relation to the study.*
- *The recording will begin after introductions. **Start recording.***

|   | Question                                                                                                                                                                                                                                                                                                                                                                                                                                                                      | Optional follow-up questions |
|---|-------------------------------------------------------------------------------------------------------------------------------------------------------------------------------------------------------------------------------------------------------------------------------------------------------------------------------------------------------------------------------------------------------------------------------------------------------------------------------|------------------------------|
|   | Demographics                                                                                                                                                                                                                                                                                                                                                                                                                                                                  |                              |
| 0 | <p>Before we start our conversation, I have a few demographic questions. If you don't want to answer a particular question, we can skip it.</p> <ol style="list-style-type: none"> <li>1. What are the first three digits of your postal code?</li> <li>2. What is your primary speciality?</li> <li>3. What is your age?</li> <li>4. What is your gender?</li> <li>5. Do you have past experience providing contraceptive services to youth (up to 25 years old)?</li> </ol> |                              |
|   | Experiences of providing care                                                                                                                                                                                                                                                                                                                                                                                                                                                 |                              |

## Youth Access to Contraception

|   |                                                                                                                                 |                                                                                                                                                                                                                                                                                                                                                                                                                                                                                                                       |
|---|---------------------------------------------------------------------------------------------------------------------------------|-----------------------------------------------------------------------------------------------------------------------------------------------------------------------------------------------------------------------------------------------------------------------------------------------------------------------------------------------------------------------------------------------------------------------------------------------------------------------------------------------------------------------|
| 1 | Can you tell me a little bit about who you are, where you are from, and the communities where you practice?                     |                                                                                                                                                                                                                                                                                                                                                                                                                                                                                                                       |
| 2 | Tell me about your experience providing contraception to youth.                                                                 | I'd like to learn more about [ <i>the experiences the participant described</i> ]. Can you tell me step by step what that looked like? Paint me a picture, if you can. [ <i>Repeat the question to learn about other experiences, if relevant</i> ]                                                                                                                                                                                                                                                                   |
| 3 | How did you become involved in contraception care?                                                                              |                                                                                                                                                                                                                                                                                                                                                                                                                                                                                                                       |
|   | Availability and accommodation                                                                                                  |                                                                                                                                                                                                                                                                                                                                                                                                                                                                                                                       |
| 4 | Can you paint me a picture of what it might look like for a youth client who accesses contraception services in your community? | <ul style="list-style-type: none"> <li>• What other contraception services are available in your community?</li> <li>• Where do clients come from to access services?</li> <li>• Do people need to leave the community to access services, if so where to?</li> <li>• How easy/hard would you say it is for youth to access these services when they need them? Why?</li> <li>• Are there any youth-specific programs or services? Can you describe them?</li> </ul> <i>Probe for both prescribing and dispensing</i> |
| 5 | What methods of contraception do you offer?                                                                                     | Are there any methods you wish you could offer?                                                                                                                                                                                                                                                                                                                                                                                                                                                                       |
| 6 | Tell me about your practice environment where you currently provide contraception                                               |                                                                                                                                                                                                                                                                                                                                                                                                                                                                                                                       |
| 7 | Tell me about the youth who seek contraception in your setting.                                                                 | Do newcomer or immigrant youth access your services?<br>If yes: In your view, how welcoming are the spaces to youth/newcomer youth? What are some of the things that make spaces welcoming?                                                                                                                                                                                                                                                                                                                           |
|   | Approachability                                                                                                                 |                                                                                                                                                                                                                                                                                                                                                                                                                                                                                                                       |
| 8 | Do you feel that all contraception methods are options for you to provide?                                                      | If no, why not?<br>If yes, what makes it possible? ( <i>Probe for education, funding, infrastructure</i> )                                                                                                                                                                                                                                                                                                                                                                                                            |

## Youth Access to Contraception

|                        |                                                                                                               |                                                                                                                                                                                                                                                                                                                                                                                                     |
|------------------------|---------------------------------------------------------------------------------------------------------------|-----------------------------------------------------------------------------------------------------------------------------------------------------------------------------------------------------------------------------------------------------------------------------------------------------------------------------------------------------------------------------------------------------|
| 9                      | How does travel or transportation impact accessibility to contraception services for youth in your community? | <ul style="list-style-type: none"> <li>• Are you aware of how seasonal weather, road conditions, or climate events impact youth ability to access services?</li> <li>• What is your perception of how youth are with local or far away contraception services?</li> </ul>                                                                                                                           |
| Affordability          |                                                                                                               |                                                                                                                                                                                                                                                                                                                                                                                                     |
| 10                     | What are the costs of accessing contraception care?                                                           | <ul style="list-style-type: none"> <li>• Are there hidden costs you are aware of, such as for travel?</li> <li>• Are you aware of what health benefits and subsidies exist for youth to help cover these hidden costs?</li> <li>• Have there been policy or funding structure changes over the last 10 years that impacted your ability to serve youth clients for the better?</li> </ul>           |
| 11                     | Was there ever a situation where your patient was not able to access contraception care due to costs?         |                                                                                                                                                                                                                                                                                                                                                                                                     |
| Acceptability          |                                                                                                               |                                                                                                                                                                                                                                                                                                                                                                                                     |
| 12                     | What are the ways that you establish trust with youth when talking about contraception?                       | <ul style="list-style-type: none"> <li>• How about building trust with trans or Two Spirit youth seeking contraception care?</li> <li>• Do you have any best practices to share around protecting youth privacy and confidentiality? Please tell me about them.</li> </ul>                                                                                                                          |
| 13                     | What does “culturally appropriate” or “culturally safe” care mean to you in the case of contraception?        | <ul style="list-style-type: none"> <li>• How do you create space for diverse identities, knowledges, and cultural practices in your care?</li> <li>• Would you characterize your practice environment to be culturally safe? What made it so? [<i>Probe about a person, an organization, a policy, a resource or educational pathway, training</i>] What or whom has been most limiting?</li> </ul> |
| Shared decision making |                                                                                                               |                                                                                                                                                                                                                                                                                                                                                                                                     |
| 14                     | When you discuss contraceptive options with youth, what does it look like? Can you describe it for me?        | <ul style="list-style-type: none"> <li>• Is there anything you would do differently if you were to provide contraception care to a newcomer or immigrant youth?</li> </ul>                                                                                                                                                                                                                          |



Youth Access to Contraception

|                                                 |                                                                                                                                                                                                                                                                                       |                                                                                                                                                                                                                                                                                                                                     |
|-------------------------------------------------|---------------------------------------------------------------------------------------------------------------------------------------------------------------------------------------------------------------------------------------------------------------------------------------|-------------------------------------------------------------------------------------------------------------------------------------------------------------------------------------------------------------------------------------------------------------------------------------------------------------------------------------|
| 15                                              | We are curious to know about consent for contraception care. One of the concepts we are exploring in this project is reproductive coercion. This is when a person feels pressure or control from others when making a reproductive choice. How does this concept appear in your care? | <ul style="list-style-type: none"> <li>• What are the barriers, if any, to achieving consent for contraception care?</li> <li>• What is your perception around resistance to contraception care in the community, for family, religious or cultural reasons? How does the community feel about family planning services?</li> </ul> |
| Appropriateness (of health services and system) |                                                                                                                                                                                                                                                                                       |                                                                                                                                                                                                                                                                                                                                     |
| 16                                              | What would you say are the characteristics of good contraceptive care for youth?                                                                                                                                                                                                      | <ul style="list-style-type: none"> <li>• Are there any characteristics that are unique to newcomer or immigrant youth?</li> <li>• Is this type of care available in your community? In your practice setting?</li> </ul>                                                                                                            |
| 17                                              | Where is there opportunity to improve services? What would need to happen to facilitate this change?                                                                                                                                                                                  |                                                                                                                                                                                                                                                                                                                                     |
| 18                                              | What resources would support the sustainability of contraception care for providers?                                                                                                                                                                                                  | <i>Probe for compensation models, benefits, scope of practice, operating and start-up costs, administrative burden, time to counsel and support patients, time to build trust, building communities of practice and relationships</i>                                                                                               |
| Ending questions                                |                                                                                                                                                                                                                                                                                       |                                                                                                                                                                                                                                                                                                                                     |
| 19                                              | If you could wave a magic wand and change the health system, what would it look like for youth trying to access contraception?                                                                                                                                                        |                                                                                                                                                                                                                                                                                                                                     |
| 20                                              | Is there anything that you might not have thought about before that occurred to you during this interview?                                                                                                                                                                            |                                                                                                                                                                                                                                                                                                                                     |
| 21                                              | Is there anything else you think I should know to better understand how providers make choices to support their youth patients in contraceptive care and how services could be improved?                                                                                              |                                                                                                                                                                                                                                                                                                                                     |
| 22                                              | Finally, what motivated you to participate in the study?                                                                                                                                                                                                                              |                                                                                                                                                                                                                                                                                                                                     |

That concludes the interview. I encourage you to check out the resources listed on your consent form, if you're keen to learn about the confidential and free sexual and reproductive health and mental health supports available to you and your patients.

Do you have any questions for me?

# BMJ Open

## Can youth-engaged research facilitate equitable access to contraception in Canada? A qualitative study protocol

|                                 |                                                                                                                                                                                                                                                                                                                                                                                                                                                                                                                                                                                                                                                                                                                                                                                                                                                                                                                                                                                                                                                                                                                                                                                                                                                                                                                                                                                                                                                                                                                                                                  |
|---------------------------------|------------------------------------------------------------------------------------------------------------------------------------------------------------------------------------------------------------------------------------------------------------------------------------------------------------------------------------------------------------------------------------------------------------------------------------------------------------------------------------------------------------------------------------------------------------------------------------------------------------------------------------------------------------------------------------------------------------------------------------------------------------------------------------------------------------------------------------------------------------------------------------------------------------------------------------------------------------------------------------------------------------------------------------------------------------------------------------------------------------------------------------------------------------------------------------------------------------------------------------------------------------------------------------------------------------------------------------------------------------------------------------------------------------------------------------------------------------------------------------------------------------------------------------------------------------------|
| Journal:                        | <i>BMJ Open</i>                                                                                                                                                                                                                                                                                                                                                                                                                                                                                                                                                                                                                                                                                                                                                                                                                                                                                                                                                                                                                                                                                                                                                                                                                                                                                                                                                                                                                                                                                                                                                  |
| Manuscript ID                   | bmjopen-2022-070904.R1                                                                                                                                                                                                                                                                                                                                                                                                                                                                                                                                                                                                                                                                                                                                                                                                                                                                                                                                                                                                                                                                                                                                                                                                                                                                                                                                                                                                                                                                                                                                           |
| Article Type:                   | Protocol                                                                                                                                                                                                                                                                                                                                                                                                                                                                                                                                                                                                                                                                                                                                                                                                                                                                                                                                                                                                                                                                                                                                                                                                                                                                                                                                                                                                                                                                                                                                                         |
| Date Submitted by the Author:   | 04-Jan-2023                                                                                                                                                                                                                                                                                                                                                                                                                                                                                                                                                                                                                                                                                                                                                                                                                                                                                                                                                                                                                                                                                                                                                                                                                                                                                                                                                                                                                                                                                                                                                      |
| Complete List of Authors:       | Munro, Sarah; The University of British Columbia, Department of Obstetrics and Gynaecology; The University of British Columbia, Centre for Health Evaluation and Outcome Sciences<br>Di Meglio, Giuseppina ; McGill University Health Centre, Montreal Children's Hospital<br>Williams, Aleyah; The University of British Columbia, Department of Obstetrics and Gynaecology<br>Barbic, Skye; The University of British Columbia, Occupational Science and Occupational Therapy<br>Begun, Stephanie; University of Toronto, Factor-Inwentash Faculty of Social Work<br>Black, Amanda; University of Ottawa, Department of Obstetrics and Gynecology<br>Carson, Andrea; Nova Scotia Health, Research, Innovation, and Discovery<br>Fortin, Michelle; Options for Sexual Health<br>Jacob, Kaiya; Youth Partner<br>Khan, Zeba; The University of British Columbia, Department of Obstetrics and Gynaecology<br>Martin-Misener, Ruth; Dalhousie University<br>Meherali, Salima; University of Alberta, Faculty of Nursing<br>Paller, Victoria; The University of British Columbia, Department of Obstetrics and Gynaecology<br>Seiyad, Hajar; Youth Partner<br>Vallée, Carol-Anne; The University of British Columbia, Department of Obstetrics and Gynaecology<br>Wahl, Kate; The University of British Columbia, Department of Obstetrics and Gynaecology<br>Norman, Wendy; The University of British Columbia, Dept of Family Practice; London School of Hygiene and Tropical Medicine Faculty of Public Health and Policy, Public Health, Environments & Society |
| <b>Primary Subject Heading</b>: | Obstetrics and gynaecology                                                                                                                                                                                                                                                                                                                                                                                                                                                                                                                                                                                                                                                                                                                                                                                                                                                                                                                                                                                                                                                                                                                                                                                                                                                                                                                                                                                                                                                                                                                                       |
| Secondary Subject Heading:      | Qualitative research, Health services research                                                                                                                                                                                                                                                                                                                                                                                                                                                                                                                                                                                                                                                                                                                                                                                                                                                                                                                                                                                                                                                                                                                                                                                                                                                                                                                                                                                                                                                                                                                   |
| Keywords:                       | Health policy < HEALTH SERVICES ADMINISTRATION & MANAGEMENT, GYNAECOLOGY, Community child health < PAEDIATRICS, QUALITATIVE RESEARCH                                                                                                                                                                                                                                                                                                                                                                                                                                                                                                                                                                                                                                                                                                                                                                                                                                                                                                                                                                                                                                                                                                                                                                                                                                                                                                                                                                                                                             |

1  
2  
3  
4  
5  
6  
7  
8  
9  
10  
11  
12  
13  
14  
15  
16  
17  
18  
19  
20  
21  
22  
23  
24  
25  
26  
27  
28  
29  
30  
31  
32  
33  
34  
35  
36  
37  
38  
39  
40  
41  
42  
43  
44  
45  
46  
47  
48  
49  
50  
51  
52  
53  
54  
55  
56  
57  
58  
59  
60

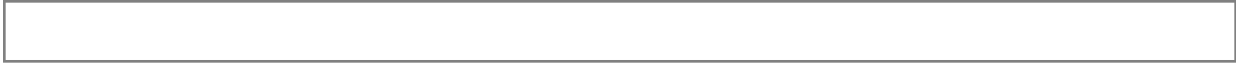

SCHOLARONE™  
Manuscripts

## Can youth-engaged research facilitate equitable access to contraception in Canada? A qualitative study protocol

### Authors:

Sarah Munro, PhD,<sup>1,2</sup> Giuseppina Di Meglio, MD, MPH,<sup>3</sup> Aleyah Williams, MPH,<sup>1</sup> Skye Barbic, PhD,<sup>5,6</sup> Stephanie Begun, PhD, MSW,<sup>7</sup> Amanda Black,<sup>8</sup> MD, MPH, Andrea Carson, PhD,<sup>9</sup> Michelle Fortin,<sup>10</sup> Kaiya Jacob,<sup>4</sup> Zeba Khan, BSc,<sup>1</sup> Ruth Martin-Misener, NP, RN,<sup>11</sup> Salima Meherali, PhD, RN,<sup>12</sup> Victoria Paller, BHSc,<sup>1</sup> Hajar Seiyad,<sup>4</sup> Carol-Anne Vallée, MD,<sup>1</sup> Kate Wahl, MSc,<sup>1</sup> Wendy V. Norman, MD, MHSc<sup>13,14</sup>

1. Department of Obstetrics and Gynaecology, The University of British Columbia
2. Centre for Health Evaluation and Outcome Sciences, The University of British Columbia
3. Montreal Children's Hospital / McGill University Health Center
4. Youth Partner
5. Department of Occupational Science and Occupational Therapy, The University of British Columbia
6. Foundry, Providence Health Care
7. Factor-Inwentash Faculty of Social Work, University of Toronto
8. Department of Obstetrics and Gynecology, University of Ottawa
9. Research, Innovation, and Discovery, Nova Scotia Health
10. Options for Sexual Health
11. School of Nursing, Dalhousie University
12. College of Health Science, Faculty of Nursing, University of Alberta
13. Department of Family Practice, University of British Columbia
14. Dept of Public Health, Environments and Society, Faculty of Public Health & Policy, London School of Hygiene and Tropical Medicine

### \* Corresponding author:

Sarah Munro  
588-1081 Burrard Street, Vancouver, BC V6Z 1Y6 (St. Paul's Hospital)  
Phone: 604-682-2344 x62893 Email: [sarah.munro@ubc.ca](mailto:sarah.munro@ubc.ca)

### Keywords

Contraception, Youth, Integrated knowledge translation, Knowledge mobilization, Health policy

**Word count:** 3,994

## Abstract

### Introduction

There is little to no evidence in Canada on the barriers that youth face when accessing contraception. We seek to identify the contraception access, experiences, beliefs, attitudes, knowledge, and needs of youth in Canada, from the perspectives of youth and youth service providers.

### Methods and analysis

This prospective, mixed methods, integrated knowledge mobilization study will involve a national sample of youth, healthcare and social service providers, and policy makers recruited via a novel relational mapping and outreach approach led by youth. Phase One will centre the voices of youth and their service providers through in-depth one-on-one interviews. We will explore the factors influencing youth access to contraception, theoretically guided by Levesque's Access to Care framework. Phase Two will focus on the co-creation and evaluation of knowledge translation products (youth stories) with youth, service providers, and policy makers.

### Ethics and dissemination

Ethical approval was received from the University of British Columbia's Research Ethics Board (H21- 01091). Full open-access publication of the work will be sought in an international peer-reviewed journal. Findings will be disseminated to youth and service providers through social media, newsletters, and communities of practice, and to policy makers through invited evidence briefs and face-to-face presentations.

### Strengths and limitations of this study

- Our theory-informed, qualitative approach will generate rich evidence on the factors that influence equitable access to contraception care for youth.
- Our integrated knowledge translation approach provides youth with the flexibility to determine the most meaningful methods of engagement, data collection, and knowledge mobilization.
- Youth stories about contraceptive access will be developed into end-of-project knowledge translation stories in partnership with youth, to accelerate the uptake of our study results into policy and practice.

## Can youth-engaged research facilitate equitable access to contraception in Canada? A qualitative study protocol

### INTRODUCTION

The unmet need for contraception among youth remains high globally, particularly for those who face structural and systemic barriers to equitable health service access.(1,2) Recent data on youth contraception patterns in Canada indicate that youth face cost barriers due to lack of subsidized options and/or household income, and youth who require or desire confidential access have the most difficulty acquiring their preferred contraception methods.(3,4) Youth with the ability to become pregnant have the right to choose if and when to have children.(5) It is necessary to provide youth with health system supports that provide access to contraception that matches their needs, preferences, and attitudes.

In Canada, the most effective contraceptive options, Long-Acting Reversible Contraception (LARC), are used by less than 10% of people of all ages with a need for contraception, and uptake is even lower among youth,(6–9) young people in the period associated with the transition from adolescence to adulthood.(10) These methods are recommended as a first-line option for youth by the Canadian Paediatric Society (9) and Society of Obstetricians and Gynaecologists primarily because of their effectiveness in pregnancy prevention.(7,8) These methods include intrauterine devices (IUD) and the subdermal contraceptive implant. Low uptake of these options across populations is due to myriad individual, social, health system factors. For instance, lack of geographic access to LARC placement and removal options may make it impossible to translate a person's desire to prevent pregnancy into health behaviours for identifying and using their chosen method.(11)

1  
2  
3  
4  
5  
6 There are limited Canadian data on the factors influencing contraception access among youth;  
7  
8 however, cost is a clear contributor. Analysis of 2009-2014 Canadian Community Health Survey  
9  
10 data showed that among females aged 15 to 24 at risk of unintended pregnancy, lower  
11  
12 household income was associated with decreased use of oral contraceptives and increased  
13  
14 reliance on injectable contraceptives or condoms alone.(4) In a survey of youth aged 14 to 21 in  
15  
16 the province of Quebec, youth who reported being unable to access their preferred method of  
17  
18 contraception most often cited cost as a barrier.(12) Canadian provincial and territorial  
19  
20 healthcare plans cover the costs of specific drugs on their formularies for populations including  
21  
22 those who are low-income, receive social benefits, or are Indigenous. Yet most do not cover all  
23  
24 contraceptive methods, and coverage through work-subsidized extended health benefits is  
25  
26 inconsistent, creating system-level barriers to the full range of contraceptive options.(13)  
27  
28  
29  
30  
31  
32  
33  
34

35 One related concern for youth is confidentiality. Confidential services increase youths' trust in  
36  
37 their care, which in turn increases the chance that youth will provide a complete sexual history  
38  
39 and discuss concerns and needs that they cannot share with a parent.(9,14) Youth who are  
40  
41 sexually active and experience cultural or familial interdiction require confidential access to  
42  
43 contraception.(15–17) When these youth receive extended health benefits through their parent  
44  
45 or guardian, a report is available to that person. Thus, despite having insurance, youth often will  
46  
47 need to pay directly for contraception, to preserve their confidentiality.(3) Confidentiality is also  
48  
49 of concern for youth in remote or close-knit communities where healthcare workers may be  
50  
51  
52  
53  
54  
55  
56  
57



1  
2  
3 known to them. Yet the existing evidence does not identify how confidentiality influences youth  
4  
5 contraceptive choices in Canada.  
6  
7  
8  
9

10 The literature, albeit limited, about youth and their contraceptive preferences comes primarily  
11  
12 from US (18–26) and UK studies.(27–29) Results of a survey involving contraceptive knowledge  
13  
14 and attitudes of 897 female youth demonstrated that youth have lower awareness and  
15  
16 knowledge about contraceptive options, particularly LARC methods, than people of other  
17  
18 ages.(30) Among teens, 63% misbelieved that a person needed to undergo an operation to have  
19  
20 an IUD, and 71% that negative effects from the contraceptive injection would last their  
21  
22 lifetime.(30) Youth who hold mistaken beliefs about contraception are less likely to seek care  
23  
24 when they become sexually active.(30) Given these data, there is pressing need to understand  
25  
26 contraceptive choices of youth in Canada. In our study we seek to answer the question: *What*  
27  
28 *are the contraception access experiences, beliefs, attitudes, knowledge, and needs of youth in*  
29  
30 *Canada, from the perspectives of youth and youth service providers?*  
31  
32  
33  
34  
35  
36  
37  
38

### 39 **METHODS AND ANALYSIS**

40  
41 We will conduct this four-year study in two phases. Our aims are to:  
42  
43  
44  
45

46 **Aim 1:** Investigate the experiences, beliefs, attitudes, knowledge, and contraceptive access  
47  
48 needs of youth (aged 15 to 25) in Canada from the perspectives of youth and service  
49  
50 providers;  
51  
52  
53  
54  
55  
56  
57

1  
2  
3 **Aim 2:** Identify the attributes of contraceptive options that matter most when making  
4  
5 decisions about methods to use, from the perspectives of youth and service providers; and  
6  
7

8  
9  
10  
11 **Aim 3:** Create and test knowledge translation (KT) products of “youth stories,” to  
12  
13 communicate results to youth, healthcare professionals, and decision makers in Canadian  
14  
15 contraception policy and practice.  
16  
17

### 21 **Study Design**

22  
23  
24 The primary mode of data collection will be one-on-one interviews. Youth stories about  
25  
26 contraceptive access will be developed into end-of-project KT products in partnership with  
27  
28 youth, using principles of narrative theory and user-centred design. These may consist of 2-  
29  
30 minute whiteboard and/or live videos of patient stories or text-based infographics, as well as  
31  
32 evidence briefs for policy makers. We will create and disseminate these youth stories to  
33  
34 Canadian stakeholders (providers, policy makers, and patients) in real time.  
35  
36  
37  
38  
39

### 40 **Integrated knowledge translation**

41  
42 This study is part of the larger research program of our thriving national Contraception and  
43  
44 Abortion Research Team (CART) and builds on our 10 years of family planning research  
45  
46 collaborations. The CART research program is built on an integrated knowledge translation (iKT)  
47  
48 approach whereby policy makers collaborate in all stages of the research process.(31,32) This  
49  
50 approach resulted in rapid removal of federal restrictions on the abortion pill in Canada in 2017,  
51  
52 its first year of availability, making it accessible in primary care settings.(33–38) However,  
53  
54  
55  
56  
57

1  
2  
3 disseminating research with policy makers is challenging when they perceive the data to be  
4 complex or political, as can occur with family planning evidence.(39–41) Our iKT collaborations –  
5  
6 underpinned by an anti-oppressive, equity-based approach of partnering closely with youth  
7  
8 throughout the research process – aim to improve the acceptability, usefulness, and relevance  
9  
10 of knowledge by co-producing it with the people best positioned to make evidence-informed  
11  
12 decisions. This approach aims to shorten the time it takes to move evidence into practice, and in  
13  
14 turn make rapid impact on contraception access for youth in Canada.  
15  
16  
17  
18  
19  
20

### **Phase One: Qualitative Interview Study with Youth and Service Providers (Aims 1 & 2)**

#### **Theoretical framework**

21  
22  
23  
24  
25  
26  
27 Our approach will be guided by social constructivist grounded theory.(42,43) Following feminist  
28  
29 and standpoint theories, constructivist grounded theory emphasizes the importance of  
30  
31 researcher flexibility and positionality. Feminist approaches start from the broad shared goal to  
32  
33 challenge gender-based oppressions and inequities.(44,45) The hallmark of these approaches is  
34  
35 reflexive interviewing. Throughout the study, our team will practice reflexivity by challenging  
36  
37 our assumptions and staying attuned to power imbalances as well as our and participants' social  
38  
39 positions.  
40  
41  
42  
43  
44  
45

46 We will use Levesque's Patient-centered Access to Care framework (46) as a theoretical guide  
47  
48 (Figure 1). Levesque incorporates factors that impact access to care from two perspectives:  
49  
50 supply (Approachability; Acceptability; Availability & Accommodation; Affordability;  
51  
52 Appropriateness); and demand (Ability to Perceive; Seek; Reach; Pay; Engage). These factors are  
53  
54  
55  
56  
57

1  
2  
3 interdependent, contextual, and dynamic. We will conduct interviews with providers (supply)  
4  
5 and youth (demand).  
6  
7  
8  
9

10 *[Insert Figure 1. A conceptual framework of access to care, adapted from Levesque (46)]*  
11  
12  
13  
14

### 15 **Sex and Gender-Based Analysis+**

16  
17 We will collect and report data on self-identified sex and gender, following SAGER guideline  
18 reporting standards.(47) We will consider both gender and sex during recruitment and  
19 screening to ensure that a diverse array of youth participate in the study.(48,49) In qualitative  
20 analysis+, we will consider sex and gender as contextual factors to understand participants'  
21 lived experiences and the process of accessing contraception care. The + sign denotes that  
22 gender does not exist in isolation and intersects with age, income, immigrant status, cultural  
23 background, geographic location, and education to produce conditions of empowerment or  
24 marginalization which, in turn, effect health access.(50)  
25  
26  
27  
28  
29  
30  
31  
32  
33  
34  
35  
36  
37  
38  
39

### 40 **Setting and Participants**

41  
42 We will recruit participants from all Canadian provinces and territories. Participants will include  
43  
44 *A) youth aged 15 to 25, and B) healthcare professionals who provide contraceptive care to*  
45 *youth.* For the purposes of this study, we define youth in both conceptual and temporal terms.  
46  
47 Conceptually, we define youth as individuals in the developmental stage of emerging adulthood,  
48 a well-established definition used to identify the period associated with the transition from  
49 adolescence to adulthood. During this period, young people engage in identity exploration and  
50  
51  
52  
53  
54  
55  
56  
57

1  
2  
3 development in order to transition into their personal and professional lives as adults.(10) While  
4  
5 Statistics Canada defines youth as aged 15 to 29, we selected an upper limit of age 25 as it is  
6  
7 typically used as an age cut-off in Canada for youth contraceptive subsidy programs,(51)  
8  
9 pediatric contraception guidelines,(3,9) and survey-based analyses of youth contraception  
10  
11 access.(4,52) We will invite youth to self-identify through a 3-item screening (*When were you*  
12  
13 *born (year and month)? Do you currently reside in Canada? Have you ever used, wanted, or*  
14  
15 *considered contraception?*). We will include people who use, want, or consider contraception  
16  
17 for purposes in addition to preventing pregnancies. We will exclude people who self-report that  
18  
19 they are younger than 15 or older than 25, or who answer 'No' to any of the above questions.  
20  
21 We will work with our community partners to recruit a spectrum of youth across Canada,  
22  
23 including from low-income, rural, newcomer, and racialized communities as well as trans and  
24  
25 gender-diverse people. We will advertise the study materials in multiple languages and include  
26  
27 Youth Research Associates (YRAs) on our team who speak English plus one or more of French,  
28  
29 Mandarin, Cantonese, Punjabi, Hindi, or Spanish. We will hire a translator or community partner  
30  
31 for participants who feel most comfortable conducting the interview in another language.  
32  
33  
34  
35  
36  
37  
38  
39  
40  
41  
42

### 43 **Recruitment**

44  
45 Our two-phase sampling strategy will begin with a purposeful sampling frame across provinces  
46  
47 and territories, rural and urban settings, gender, age (15-17, 19-22, and 23-25), and ethnicity. As  
48  
49 data collection progresses, we will engage in additional theoretical sampling to  
50  
51 confirm/disconfirm results, fill in data gaps, and refine our evolving theory.  
52  
53  
54  
55  
56  
57

- 1  
2  
3  
4  
5  
6  
7  
8  
9  
10  
11  
12  
13  
14  
15  
16  
17  
18  
19  
20  
21  
22  
23  
24  
25  
26  
27  
28  
29  
30  
31  
32  
33  
34  
35  
36  
37  
38  
39  
40  
41  
42  
43  
44
- **Youth:** We will use a multifaceted, community-based strategy to recruit youth, including a study website, social marketing campaign (e.g. Instagram advertising and re-posting of study ads by youth- and health-oriented organizations), and snowball sampling. Youth researchers on our team will design and implement a youth outreach strategy using principles of ‘relational’ stakeholder mapping (53–56) to engage youth-serving organizations. These YRAs will then engage individuals from youth-serving organizations in knowledge brokering; e.g. they may provide social media content development training in exchange for a welcome platform to share information about our project.
  - **Healthcare professionals:** We will recruit through listservs of health professional organizations (e.g. Society of Obstetricians and Gynaecologists of Canada, Canadian Pediatric Society, Canadian Pharmacists Association, Nurse Practitioner Association of Canada), youth sexual health clinics, sexual and reproductive health organizations (e.g. Action Canada for Sexual Health, Options for Sexual Health), and email listservs for family planning providers (e.g. Canadian Abortion Providers Support Platform). Interested participants will receive the online consent form.

45 Each participant will be offered an honorarium of \$50 for their participation in an interview. We  
46 will collect data until we reach saturation by informational redundancy (new data repeats  
47 previous data) and have sufficient data to explain the phenomenon.(57) To ensure we have a  
48 diverse, information-rich sample, we will seek to saturate each sub-group in our purposeful  
49 sampling framework: rural and urban youth; those in each province and territory; immigrant,  
50  
51  
52  
53  
54  
55  
56  
57

1  
2  
3 refugee, and newcomer youth; disabled youth; Black, Indigenous, and People of Colour (BIPOC);  
4  
5 Two-Spirit, Lesbian, Gay, Bisexual, Transgender, Queer, Questioning, Asexual, Intersex  
6  
7 (2SLGBTQQAI+) youth. Based on analogous studies (35,58) we will likely conduct interviews with  
8  
9 10-15 youth per group, acknowledging that participants will have intersecting identities. We  
10  
11 predict our sample of youth will thus be upwards of 100 total participants.  
12  
13  
14  
15  
16  
17

### 18 **Data collection**

19  
20 Our data collection methods seek to promote confidentiality and build trust, and have been co-  
21  
22 designed with the team's YRAs. We will first invite youth participants to complete an online  
23  
24 enrolment survey using REDCap electronic data capture tools (59,60) hosted at the BC  
25  
26 Children's Hospital Research Institute. This survey will collect demographic data to provide  
27  
28 context on identity characteristics that will assist in our qualitative interpretation, our sex- and  
29  
30 gender+ analysis, and our purposeful sampling. Interested participants will also indicate their  
31  
32 preference for either an in-depth, open-ended 60-minute audio interview by phone or Zoom  
33  
34 software, or to complete a written interview on a confidential study website form. Youth  
35  
36 perceive that asynchronous written interviews by email or website are acceptable, confidential  
37  
38 methods for sharing sensitive reproductive experiences, particularly compared to face-to-face  
39  
40 data collection (58,61) and in a COVID-19 context.(62) Nearly 100% of youth in Canada aged 15  
41  
42 to 30 use the internet daily, a trend observed across all provinces and household income  
43  
44 groups.(63) These ethical and access considerations will be discussed on an ongoing basis with  
45  
46 community groups who are partners in this work. Considerations may include shorter  
47  
48 interviews, in-person interviews, and the inclusion of a third party or social worker to the  
49  
50  
51  
52  
53  
54  
55  
56  
57

1  
2  
3 interview space to better support youth. The youth consent form, demographic information,  
4  
5 and (if applicable) written interview data will be linked automatically through a numeric  
6  
7 participant identification (PID) generated by REDCap.  
8  
9

10 We will conduct in-depth interviews with healthcare professionals to investigate their  
11  
12 perspectives on the accessibility and appropriateness of existing resources and supports for  
13  
14 contraceptive decision-making for youth, and opportunities for improvement. We will collect  
15  
16 and document basic demographic information (postal code, primary specialty, age, gender,  
17  
18 experience prescribing contraception with youth) verbally before the start of healthcare  
19  
20 professional interviews.  
21  
22  
23  
24

25 Each 60-90 minutes audio interview will be conducted by the lead author or an  
26  
27 experienced trainee, with a translator or YRA present if the participant desires language  
28  
29 support. Our topic guides will consist of open-ended questions about access to contraception  
30  
31 and probes to explore the dimensions of Levesque's Access Framework (see Supplementary File  
32  
33 1 and Supplementary File 2).(46) This also will include where and how youth would like to  
34  
35 access services, including in pandemic and non-pandemic conditions. We will probe for  
36  
37 knowledge and perceptions of feasibility and acceptability of LARC and youth-led health  
38  
39 services. After each interview, we will provide youth with a list of resources in case they have  
40  
41 follow-up questions or interest to access contraceptive care. Interviews with youth will begin  
42  
43 before those with service providers, to ensure that our theory is grounded first in youth  
44  
45 experiences.  
46  
47  
48  
49  
50  
51  
52  
53  
54

## 55 **Data analysis**

56  
57  
58 2022-Dec-22

13



1  
2  
3 Interview data will be transcribed and/or translated, if applicable, by professional transcription  
4 and translation services. Trainees who conducted the interviews will lead data analysis, with  
5  
6 and translation services. Trainees who conducted the interviews will lead data analysis, with  
7  
8 guidance from the lead author and the YRAs. Our analysis team will independently read and  
9  
10 code a sub-set of transcripts. The coding process has 4 steps: (1) open and *in vivo* coding to  
11  
12 identify properties of emerging concepts, (2) focused coding to identify and organize codes into  
13  
14 batches of similar or related phenomena, (3) comparing data to data (constant comparison),  
15  
16 and (4) theoretical coding to sort, synthesise, and organize the data into major conceptual  
17  
18 categories.(42) We will compare our codebooks and engage in discussion to achieve conceptual  
19  
20 and semantic congruency, and then code another two transcripts to test our merged codebook  
21  
22 to ensure it makes implicit processes and structures visible. Next, using the finalized codebook,  
23  
24 the analysis team will independently code a sub-section of transcripts (each transcript will have  
25  
26 two coders). We will meet weekly to discuss our interpretations and revise the codebook as  
27  
28 needed. Coding will be facilitated by use of NVivo analysis software (version 12).(64) All  
29  
30 qualitative analyses will include consideration of how sex, gender, and other diversity  
31  
32 characteristics influence experiences and attitudes at individual and system levels.(48) To assist  
33  
34 interpretation, we will draw visual maps of those characteristics, relationships, and social worlds  
35  
36 using grounded theory mapping techniques.(65)  
37  
38  
39  
40  
41  
42  
43  
44  
45  
46

### 47 **Verification strategies**

48  
49  
50 Throughout the research, we will pursue verification strategies to ensure reliability and validity,  
51  
52 including constant comparison (comparing open-ended responses and interview data for each  
53  
54 participant, among youth, among healthcare professionals, between samples, and over time),  
55  
56  
57

1  
2  
3 keeping a data trail, and sampling to theoretical sufficiency.(66,67) Our assessment of  
4  
5 *sufficiency* will be guided by the question, “Given the theory, do we have sufficient data to  
6  
7 illustrate it?” To establish *trustworthiness* of the data, each participant will be asked if they  
8  
9 consent to being emailed a password-protected transcript of their interview for member-  
10  
11 checking feedback (i.e., review what they said, edit as needed, and add more information). We  
12  
13 also will write memos throughout to engage in self-reflection, identify gaps in data collection,  
14  
15 and serve as a record of the analytic process.  
16  
17  
18  
19  
20  
21  
22

### 23 **Phase Two: Human-centred design, development, and evaluation of youth stories (Aim 3)**

24  
25 We will use the knowledge generated in Phase One to ideate, prototype, and test ‘youth  
26  
27 stories.’ We anticipate that youth narratives on contraception access will help provider, policy  
28  
29 maker, and patient audiences prioritize, understand, and recall information, and enhance  
30  
31 interest in youth lived experiences.(68–71) Our evaluation will assess the impact of the stories  
32  
33 on audience knowledge (primary outcome) and narrative immersion (e.g. interest, involvement,  
34  
35 empathy), as well as unintended outcomes (persuasion).  
36  
37  
38  
39  
40  
41  
42

### 43 **Method**

44  
45 We will employ user-centered design to develop and evaluate youth stories, a well-established  
46  
47 approach that involves ideation, rapid prototyping, and iterating upon the strengths and  
48  
49 weaknesses of prototypes so that innovations may be designed quickly and with the direct input  
50  
51 and preferences of actual “end-users” of a specific product or service.(72–74) It involves 5 steps:  
52  
53 1) empathize (understanding the way people do things and why), 2) define (expressing the  
54  
55  
56  
57

1  
2  
3 specific problem the intervention will address), 3) ideate (generating solution concepts), 4)  
4  
5 prototype (building models to elicit feedback from colleagues), and 5) test (soliciting feedback  
6  
7 from users).(75) See Figure 2 for an illustration of these steps. We will continue to follow  
8  
9 feminist and standpoint approaches in Phase Two, practicing reflexivity by challenging our  
10  
11 assumptions about the knowledge generated in Phase One, and seeking to be attuned to end-  
12  
13 users' comfort level, differences in power and status, and the effect of gender, race, and age on  
14  
15 the user-centred design process.  
16  
17  
18  
19  
20  
21  
22

23 *[Insert Figure 2. User-centered design process to develop and evaluate youth stories]*  
24  
25  
26  
27

## 28 **Study Population and Recruitment**

29  
30  
31 Our design process will engage the three key audiences for this program of research: youth and  
32  
33 healthcare professionals (as in Phase One), as well as health system decision-makers responsible  
34  
35 for the planning and delivery of contraceptive services. We will send email invitations to the  
36  
37 youth and healthcare professional participants from Phase One, asking if they would be  
38  
39 interested to contribute to a workshop to co-design youth stories. To recruit health system  
40  
41 decision makers (e.g., public health officials, civil servants, and politicians), we will advertise the  
42  
43 study by email invitation through the listservs of the Contraception and Abortion Research  
44  
45 Team, as well as health professional and regulatory organizations in each province and territory,  
46  
47 as in our pilot research.(76) We will conduct the workshops virtually by video conference to  
48  
49 account for national diversity in populations, health service delivery, and access experiences,  
50  
51 and to make it easy and accessible for participants in different regions and time zones.  
52  
53  
54  
55  
56  
57

## Workshop activities

The empathize and define stages will be completed through Phase One interviews. In Phase Two, design thinking workshops will allow us to ideate, prototype, and test and will be co-facilitated by the first author, a trainee, and at least one YRA. The YRAs will have been involved in the Phase One data analysis and will collaborate with the trainees to review the de-identified transcripts and extract stories that best illustrate key themes from Phase One. Each draft prototype will take the format of a 'wireframe' or storyboard to facilitate in-depth feedback. This preliminary work to develop the storyboards will be conducted through an end-of-project team workshop. We will build stories according to the Narrative Immersion Model (NIM)(71,77) using experience and process narratives and evaluating them with end-users prior to dissemination. The NIM model indicates that when the target effect of a narrative is to inform, then *experience narratives* (e.g. what it is like to access contraception) and *process narratives* (e.g. how youth made a contraceptive choice) are appropriate and can mitigate unintended changes in audience attitudes and behaviours.

Then, we will conduct human-centred design workshops to refine prototypes. Workshops will be conducted via Zoom and consist of 1) a short presentation on Phase 1 and the prototype 'storyboards', followed by 2) a moderated discussion to brainstorm and generate ideas, first in breakout rooms and then as a group. The aim is to focus participant ideas towards creation of a series of refined testable prototypes for the youth stories. These decisions will be emergent and co-determined with youth participants. The stories will be composite or aggregate, rather than

1  
2  
3 individual. Combining the stories from a large number of people can assist to both protect  
4  
5 participant anonymity and convey a systemic story, as opposed to a single event or individual  
6  
7 experience.(68) The workshops will be audio-recorded and transcribed by Zoom software to  
8  
9 facilitate iterative revision of the prototypes. After feedback from each session, we will revise  
10  
11 the prototype storyboards.  
12  
13  
14  
15  
16  
17

18 Based on best practices,(78,79) we anticipate to conduct three or more cycles of ideation and  
19  
20 prototyping to generate prototypes that address our KT aims and are satisfactory to all  
21  
22 workshop participants. We plan to hold a total of 10 workshops, including: (i) *at least three*  
23  
24 *workshops each with youth, healthcare professionals, and policy makers involving five*  
25  
26 *participants each*, which our experience has identified is an optimal number for generating  
27  
28 ideation and discussion; and (ii) one synthesis workshop involving all three stakeholder groups  
29  
30 and led by the YRAs to generate shared meaning and ensure the final prototypes are inclusive  
31  
32 and reflect youth voices.  
33  
34  
35  
36  
37  
38  
39  
40

## 41 **Evaluation**

42  
43 Using the same recruitment strategies as in Phase One, we will recruit health system decision  
44  
45 makers, healthcare professionals, and youth who are naïve to the study design. The evaluation  
46  
47 will be completed via online survey (RedCap). We will ask participants to complete a  
48  
49 demographic questionnaire and a knowledge pre-test involving 5 statements about  
50  
51 contraception access, each scored on a 5-item Likert scale ranging from strongly agree to  
52  
53 strongly disagree. Participants will be presented with the suite of stories to review and will  
54  
55  
56  
57

1  
2  
3 complete a post-test. The post-test will include the same 5-item knowledge test used in the pre-  
4  
5 test and a single-item question with a yes/no response: “Did reading the stories give you  
6  
7 information about contraception access that you did not have before?”  
8  
9

10  
11  
12  
13 After completing these tasks, participants will complete a qualitative survey investigating  
14  
15 perceptions of other elements of the Narrative Immersion Model (e.g. interest, involvement,  
16  
17 immersion) and unintended outcomes (e.g. persuasion).(71) We will measure change in  
18  
19 knowledge by comparing pre- and post-test scores from the 5-item knowledge test (non-  
20  
21 parametric Wilcoxon signed rank test).(80) Statistical significance will be denoted as  $p \leq 0.05$ .  
22  
23 We will report qualitative responses using reflexive thematic analysis, stratified by audience  
24  
25 type.(81–83) We will evaluate the reach of youth stories and study website performance  
26  
27 through Google analytics, unique website visitors, view count, engagement (watch time per  
28  
29 view), video shares and (dis)likes, and hashtag tracking. We will report data descriptively.  
30  
31  
32  
33  
34  
35  
36  
37

38 Following evaluation, we will produce final versions of the youth stories. Based on best  
39  
40 practices,(84) these may consist of 2-minute whiteboard and/or live videos of patient stories or  
41  
42 text-based infographics, as well as evidence briefs for policy makers. The methods will be  
43  
44 determined through the design workshops we complete in Phase Two.  
45  
46  
47  
48  
49

## 50 **Patient and Public Involvement**

51  
52 The research question and study design were co-developed with patient partners from the UBC  
53  
54 Youth Research Advisory Panel (Y-RAP) through a series of workshop meetings. As described  
55  
56  
57

1  
2  
3 above, Youth Research Associates (patient partners) are full members of the research team,  
4  
5 guiding all study decisions and engaging in recruitment, data collection, and analysis and  
6  
7 dissemination of youth stories.  
8  
9

## 10 11 12 13 **ETHICS AND DISSEMINATION**

14  
15 Ethical approval for this study has been provided by the UBC Behavioural Research Ethics Board  
16  
17 (H21-01091). Results will be published in peer-reviewed journal publications. Due to the  
18  
19 sensitive nature of the research and ethical restrictions to protect the privacy of research  
20  
21 participants, the qualitative dataset will not be publicly available. The participants of this study  
22  
23 will not provide written consent for their transcript data to be shared publicly.  
24  
25  
26  
27  
28  
29

## 30 31 **DISCUSSION**

32  
33 Our research will generate evidence on the contraception access needs of youth in Canada. Our  
34  
35 project has the potential to inform Canadian contraceptive policy and practice to mitigate youth  
36  
37 access barriers; improve contraception access for youth; and ultimately, reduce rates of  
38  
39 unintended pregnancy and need for abortion among youth. To accelerate the impact of our  
40  
41 research, we will translate the knowledge generated through this project into tangible KT tools  
42  
43 in partnership with knowledge users through an inclusive design process.  
44  
45  
46  
47  
48  
49

## 50 51 **Acknowledgements**

1  
2  
3 Thank you to members of the Contraception and Abortion Research Team (CART-GRAC) for  
4 providing their expert feedback in preparing this study. Thank you to the youth advisors who  
5 collaborated to generate the questions and approaches for this study.  
6  
7  
8  
9  
10

### 11 12 **Authors' contributions**

13  
14 SM and GDM developed the study concept and approach with input from all coauthors. SM and  
15 AW wrote the first draft of the manuscript. KJ, ZK, HS, and WVN significantly contributed to the  
16 design. SM, GDM, AW, SB, SB, AB, AC, MF, KJ, ZK, RMM, SM, VP, HS, CAV, KW, WVN contributed  
17 to writing the manuscript and all revisions and reviewed and approved the final manuscript.  
18  
19  
20  
21  
22  
23  
24

### 25 26 27 **Funding statement**

28  
29 This study is funded through a Project Grant from the Canadian Institutes for Health Research  
30 (CIHR) (180633). SM is supported by a Michael Smith Health Research BC Scholar Award  
31 (18270). WVN is supported by the UBC Department of Family Practice and CIHR and the Public  
32 Health Agency of Canada with a Chair in Family Planning Public Health Research (2014-2024,  
33 CPP-329455-107837).  
34  
35  
36  
37  
38  
39  
40  
41  
42  
43  
44

### 45 46 **Competing Interests**

47 GDM is a member of the Adolescent Health Committee, Canadian Paediatric Society, and lead author of  
48 the policy statement advocating for universal no-cost access to contraception published by the Canadian  
49 Paediatric Society. AB has received Advisory Board consulting fees from Organon, Bayer, Mithra, as well  
50 as honoraria for lectures and presentations from Bayer, Organon, and Searchlight. AB is also President-  
51  
52  
53  
54  
55  
56  
57



1  
2  
3 Elect and Director of the Board for the Society of Obstetricians and Gynecologists of Canada. ZK is a  
4  
5 Board Member with Options for Sexual Health. MF is employed by Options for Sexual Health.  
6  
7  
8  
9  
10  
11  
12  
13  
14

## 15 References

- 18 1. World Health Organization. Sexual and reproductive health and rights: infographic snapshot  
19 [Internet]. 2022 Apr. Report No.: WHO/SRH/21.21. Available from:  
20 <https://www.who.int/publications/i/item/WHO-SRH-21.21>  
21  
22
- 23 2. Todd N, Black A. Contraception for Adolescents. *J Clin Res Pediatr Endocrinol*. 2020 Jan;12(Suppl  
24 1):28–40.  
25
- 26 3. Di Meglio G, Yorke E. Universal access to no-cost contraception for youth in Canada. *Paediatr Child*  
27 *Health*. 2019 May 15;24(3):160–4.  
28
- 29 4. Nethery E, Schummers L, Maginley KS, Dunn S, Norman WV. Household income and contraceptive  
30 methods among female youth: a cross-sectional study using the Canadian Community Health Survey  
31 (2009–2010 and 2013–2014). *CMAJ Open*. 2019 Jan 10;7(4):E646–53.  
32  
33
- 34 5. Ross L, Solinger R. *Reproductive justice: An introduction*. Vol. 1. Univ of California Press; 2017.  
35
- 36 6. Black A, Yang Q, Wu Wen S, Lalonde AB, Guilbert E, Fisher W. Contraceptive use among Canadian  
37 women of reproductive age: results of a national survey. *J Obstet Gynaecol Can JOGC J Obstet*  
38 *Gynecol Can JOGC*. 2009 Jul;31(7):627–40.  
39
- 40 7. Black A, Guilbert E, Costescu D, Dunn S, Fisher W, Kives S, et al. Canadian Contraception Consensus  
41 (Part 3 of 4): Chapter 7 – Intrauterine Contraception. *J Obstet Gynaecol Can*. 2016 Feb 1;38(2):182–  
42 222.  
43  
44
- 45 8. Black A, Guilbert E, Co-Authors, Costescu D, Dunn S, Fisher W, et al. Canadian Contraception  
46 Consensus (Part 1 of 4). *J Obstet Gynaecol Can JOGC J Obstétrique Gynécologie Can JOGC*. 2015  
47 Oct;37(10):936–42.  
48
- 49 9. Di Meglio G, Crowther C, Simms J. Contraceptive care for Canadian youth. *Paediatr Child Health*.  
50 2018 Jun 12;23(4):271–7.  
51
- 52 10. Arnett JJ. *Emerging adulthood: The winding road from the late teens through the twenties*. New  
53 York: Oxford University Press; 2004.  
54  
55  
56  
57

11. Aiken ARA, Borrero S, Callegari LS, Dehlendorf C. Rethinking the Pregnancy Planning Paradigm: Unintended Conceptions or Unrepresentative Concepts? *Perspect Sex Reprod Health*. 2016 Sep;48(3):147–51.
12. Di Meglio G, Yeates J, Seidman G. Can youth get the contraception they want? Results of a pilot study in the province of Quebec. *Paediatr Child Health*. 2020 Apr 10;25(3):160–5.
13. Motluk A. Birth control often not covered by Canadian insurers. *CMAJ Can Med Assoc J*. 2016 Oct 4;188(14):1001–2.
14. Dehlendorf C, Akers AY, Borrero S, Callegari LS, Cadena D, Gomez AM, et al. Evolving the Preconception Health Framework. *Obstet Gynecol*. 2021 Feb;137(2):234–9.
15. Hulme J, Dunn S, Guilbert E, Soon J, Norman W. Barriers and facilitators to family planning access in Canada: Stakeholder input on implications for health system and policy reform. *Healthc Policy Polit Santé*. 2015 Feb;10(3):48–63.
16. Salehi R, Hynie M, Flicker S. Factors Associated with Access to Sexual Health Services Among Teens in Toronto: Does Immigration Matter? *J Immigr Minor Health*. 2014 Aug 1;16(4):638–45.
17. Shoveller J, Chabot C, Soon JA, Levine M. Identifying Barriers to Emergency Contraception Use Among Young Women from Various Sociocultural Groups in British Columbia, Canada. *Perspect Sex Reprod Health*. 2007;39(1):13–20.
18. Kavanaugh ML, Jerman J. Contraceptive method use in the United States: trends and characteristics between 2008, 2012 and 2014. *Contraception*. 2018;97(1):14–21.
19. Coles MS, Makino KK, Stanwood NL. Contraceptive experiences among adolescents who experience unintended birth. *Contraception*. 2011;84(6):578–84.
20. Brittain AW, Loyola Briceno AC, Pazol K, Zapata LB, Decker E, Rollison JM, et al. Youth-Friendly Family Planning Services for Young People: A Systematic Review Update. *Am J Prev Med*. 2018 Nov;55(5):725–35.
21. Brown MK, Auerswald C, Eyre SL, Deardorff J, Dehlendorf C. Identifying Counseling Needs of Nulliparous Adolescent Intrauterine Contraceptive Users: A Qualitative Approach. *J Adolesc Health*. 2013 Mar 1;52(3):293–300.
22. Jones RK, Biddlecom AE. The more things change...: the relative importance of the internet as a source of contraceptive information for teens. *Sex Res Soc Policy*. 2011;8(1):27–37.
23. Jones RK, Boonstra H. Confidential reproductive health services for minors: the potential impact of mandated parental involvement for contraception. *Perspect Sex Reprod Health*. 2004;36(5):182–91.
24. Kittur ND, Secura GM, Peipert JF, Madden T, Finer LB, Allsworth JE. Comparison of contraceptive use between the Contraceptive CHOICE Project and state and national data. *Contraception*. 2011;83(5):479–85.

- 1  
2  
3 25. Melo J, Peters M, Teal S, Guiahi M. Adolescent and Young Women's Contraceptive Decision-Making  
4 Processes: Choosing "The Best Method for Her." *J Pediatr Adolesc Gynecol*. 2015 Aug 1;28(4):224–8.  
5  
6 26. Hoopes AJ, Gilmore K, Cady J, Akers AY, Ahrens KR. A Qualitative Study of Factors That Influence  
7 Contraceptive Choice among Adolescent School-Based Health Center Patients. *J Pediatr Adolesc*  
8 *Gynecol*. 2016 Jun;29(3):259–64.  
9  
10 27. Lewis R, Blake C, Shimonovich M, Coia N, Duffy J, Kerr Y, et al. Disrupted prevention: condom and  
11 contraception access and use among young adults during the initial months of the COVID-19  
12 pandemic. An online survey. *BMJ Sex Reprod Health*. 2021 Oct 1;47(4):269–76.  
13  
14 28. Bitzer J, Abalos V, Apter D, Martin R, Black A, Global CARE (Contraception: Access, Resources,  
15 Education) Group. Targeting factors for change: contraceptive counselling and care of female  
16 adolescents. *Eur J Contracept Reprod Health Care Off J Eur Soc Contracept*. 2016 Dec;21(6):417–30.  
17  
18 29. Geary RS, Tomes C, Jones KG, Glasier A, Macdowall W, Datta J, et al. Actual and preferred  
19 contraceptive sources among young people: findings from the British National Survey of Sexual  
20 Attitudes and Lifestyles. *BMJ Open*. 2016 Sep 1;6(9):e011966.  
21  
22 30. Craig AD, Dehlendorf C, Borrero S, Harper CC, Rocca CH. Exploring young adults' contraceptive  
23 knowledge and attitudes: disparities by race/ethnicity and age. *Womens Health Issues Off Publ*  
24 *Jacobs Inst Womens Health*. 2014 Jun;24(3):e281-289.  
25  
26 31. Bowen S, Graham ID. Integrated knowledge translation. In: Straus SE, Tetroe J, Graham ID, editors.  
27 Knowledge Translation in Health Care [Internet]. John Wiley & Sons, Ltd; 2013 [cited 2016 Mar 12].  
28 p. 14–23. Available from:  
29 <http://onlinelibrary.wiley.com.ezproxy.library.ubc.ca/doi/10.1002/9781118413555.ch02/summary>  
30  
31 32. Canadian Institutes of Health Research. Guide to knowledge translation planning at CIHR: integrated  
32 and end-of-grant approaches. Canadian Institutes of Health Research; 2012.  
33  
34 33. Norman W, Munro S, Brooks M, Devane C, Guilbert E, Renner R, et al. Could implementation of  
35 mifepristone address Canada's urban-rural abortion access disparity: a mixed methods  
36 implementation study protocol. *BMJ Open*. 2019;9:e028443.  
37  
38 34. Munro S, Wahl K, Soon JA, Guilbert E, Wilcox ES, Leduc-Robert G, et al. Pharmacist dispensing of the  
39 abortion pill in Canada: Diffusion of Innovation meets integrated knowledge translation. *Implement*  
40 *Sci*. 2021 Aug 3;16(1):76.  
41  
42 35. Munro S, Guilbert E, Wagner MS, Wilcox ES, Devane C, Dunn S, et al. Perspectives Among Canadian  
43 Physicians on Factors Influencing Implementation of Mifepristone Medical Abortion: A National  
44 Qualitative Study. *Ann Fam Med*. 2020 Sep 1;18(5):413–21.  
45  
46 36. Dineley B, Munro S, Norman WV. Leadership for success in transforming medical abortion policy in  
47 Canada. *PLOS ONE*. 2020 Jan 8;15(1):e0227216.  
48  
49 37. Guilbert E, Wagner MS, Munro S, Wilcox ES, Dunn S, Soon JA, et al. Slow implementation of  
50 mifepristone medical termination of pregnancy in Quebec, Canada: a qualitative investigation. *Eur J*  
51 *Contracept Reprod Health Care Off J Eur Soc Contracept*. 2020 Jun;25(3):190–8.  
52  
53  
54  
55  
56  
57

- 1  
2  
3 38. Wagner MS, Munro S, Wilcox ES, Devane C, Norman WV, Dunn S, et al. Barriers and Facilitators to  
4 the Implementation of First Trimester Medical Abortion With Mifepristone in the Province of  
5 Québec: A Qualitative Investigation. *J Obstet Gynaecol Can.* 2020 May 1;42(5):576–82.  
6  
7 39. Kothari A, MacLean L, Edwards N. Increasing capacity for knowledge translation: understanding how  
8 some researchers engage policy makers. *Evid Policy.* 2009;5(1):33–51.  
9  
10 40. Lawrence LM, Curran AB and J. Integrated Knowledge Translation with Public Health Policy Makers:  
11 A Scoping Review [Internet]. *Healthcare Policy.* 2019 [cited 2019 Apr 23]. Available from:  
12 [https://www.longwoods.com/content/25792/healthcare-policy/integrated-knowledge-translation-](https://www.longwoods.com/content/25792/healthcare-policy/integrated-knowledge-translation-with-public-health-policy-makers-a-scoping-review?utm_source=Healthcare+Policy+TOC+Alert&utm_campaign=e7423b8cba-TOC+Alert+-+HPol+Vol.+14+No.+3&utm_medium=email&utm_term=0_fce19ffccc-e7423b8cba-48565577)  
13 [with-public-health-policy-makers-a-scoping-](https://www.longwoods.com/content/25792/healthcare-policy/integrated-knowledge-translation-with-public-health-policy-makers-a-scoping-review?utm_source=Healthcare+Policy+TOC+Alert&utm_campaign=e7423b8cba-TOC+Alert+-+HPol+Vol.+14+No.+3&utm_medium=email&utm_term=0_fce19ffccc-e7423b8cba-48565577)  
14 [review?utm\\_source=Healthcare+Policy+TOC+Alert&utm\\_campaign=e7423b8cba-TOC+Alert+-](https://www.longwoods.com/content/25792/healthcare-policy/integrated-knowledge-translation-with-public-health-policy-makers-a-scoping-review?utm_source=Healthcare+Policy+TOC+Alert&utm_campaign=e7423b8cba-TOC+Alert+-+HPol+Vol.+14+No.+3&utm_medium=email&utm_term=0_fce19ffccc-e7423b8cba-48565577)  
15 [+HPol+Vol.+14+No.+3&utm\\_medium=email&utm\\_term=0\\_fce19ffccc-e7423b8cba-48565577](https://www.longwoods.com/content/25792/healthcare-policy/integrated-knowledge-translation-with-public-health-policy-makers-a-scoping-review?utm_source=Healthcare+Policy+TOC+Alert&utm_campaign=e7423b8cba-TOC+Alert+-+HPol+Vol.+14+No.+3&utm_medium=email&utm_term=0_fce19ffccc-e7423b8cba-48565577)  
16  
17 41. Lavis JN, Robertson D, Woodside JM, McLeod CB, Abelson J, Group KTS. How can research  
18 organizations more effectively transfer research knowledge to decision makers? *Milbank Q.*  
19 2003;81(2):221–48, 171–2.  
20  
21 42. Charmaz K. *Constructing Grounded Theory: A Practical Guide through Qualitative Analysis*  
22 (Introducing Qualitative Methods series). London: Sage; 2006.  
23  
24 43. Charmaz K. “With Constructivist Grounded Theory You Can’t Hide”: Social Justice Research and  
25 Critical Inquiry in the Public Sphere. *Qual Inq.* 2020 Feb 1;26(2):165–76.  
26  
27 44. Harding S, Norberg K. New feminist approaches to social science methodologies: An introduction.  
28 *Signs J Women Cult Soc.* 2005;30(4):2009–15.  
29  
30 45. Harding SG. *The feminist standpoint theory reader: Intellectual and political controversies.*  
31 Psychology Press; 2004.  
32  
33 46. Levesque JF, Harris MF, Russell G. Patient-centred access to health care: conceptualising access at  
34 the interface of health systems and populations. *Int J Equity Health.* 2013;12(1):18.  
35  
36 47. Heidari S, Babor TF, De Castro P, Tort S, Curno M. Sex and Gender Equity in Research: rationale for  
37 the SAGER guidelines and recommended use. *Res Integr Peer Rev.* 2016 May 3;1(1):2.  
38  
39 48. Day S, Mason R, Lagosky S, Rochon PA. Integrating and evaluating sex and gender in health research.  
40 *Health Res Policy Syst.* 2016 Oct 10;14(1):75.  
41  
42 49. Government of Canada CI of HR. Sex, Gender and Knowledge Translation - CIHR [Internet]. 2016  
43 [cited 2019 Sep 24]. Available from: <http://www.cihr-irsc.gc.ca/e/49933.html>  
44  
45 50. Hankivsky O, Springer KW, Hunting G. Beyond sex and gender difference in funding and reporting of  
46 health research. *Res Integr Peer Rev.* 2018 Aug 28;3(1):6.  
47  
48 51. Government of Ontario M of H and LTC. OHIP+: Children and Youth Pharmacare - Drugs and Devices  
49 - Health Care Professionals - MOH [Internet]. Government of Ontario, Ministry of Health and Long-  
50 Term Care; [cited 2022 Oct 11]. Available from:  
51 <https://www.health.gov.on.ca/en/pro/programs/drugs/ohipplus/>  
52  
53  
54  
55  
56  
57

- 1  
2  
3 52. Dunn S, Xiong AQ, Nuernberger K, Norman WV. Non-use of Contraception by Canadian Youth Aged  
4 15 to 24: Findings From the 2009-2010 Canadian Community Health Survey. *J Obstet Gynaecol Can*  
5 *JOGC J Obstet Gynecol Can JOGC*. 2019 Jan;41(1):29–37.  
6  
7 53. Schiller C, Winters M, Hanson HM, Ashe MC. A framework for stakeholder identification in concept  
8 mapping and health research: a novel process and its application to older adult mobility and the  
9 built environment. *BMC Public Health*. 2013 May 2;13:428.  
10  
11 54. Black K, McBean E. Increased Indigenous participation in environmental decision-making: A policy  
12 analysis for the improvement of Indigenous health. *Int Indig Policy J*. 2016;7(4).  
13  
14 55. Balane MA, Palafox B, Palileo-Villanueva LM, McKee M, Balabanova D. Enhancing the use of  
15 stakeholder analysis for policy implementation research: towards a novel framing and  
16 operationalised measures. *BMJ Glob Health*. 2020 Nov 1;5(11):e002661.  
17  
18 56. Reed MS, Graves A, Dandy N, Posthumus H, Hubacek K, Morris J, et al. Who's in and why? A typology  
19 of stakeholder analysis methods for natural resource management. *J Environ Manage*. 2009 Apr  
20 1;90(5):1933–49.  
21  
22 57. Saunders B, Sim J, Kingstone T, Baker S, Waterfield J, Bartlam B, et al. Saturation in qualitative  
23 research: exploring its conceptualization and operationalization. *Qual Quant*. 2017 Sep 14;1–15.  
24  
25 58. Vogel KI, LaRoche KJ, El-Haddad J, Chaumont A, Foster AM. Exploring Canadian women's knowledge  
26 of and interest in mifepristone: results from a national qualitative study with abortion patients.  
27 *Contraception*. 2016 Aug 1;94(2):137–42.  
28  
29 59. Harris PA, Taylor R, Thielke R, Payne J, Gonzalez N, Conde JG. Research electronic data capture  
30 (REDCap)--a metadata-driven methodology and workflow process for providing translational  
31 research informatics support. *J Biomed Inform*. 2009 Apr;42(2):377–81.  
32  
33 60. Harris PA, Taylor R, Minor BL, Elliott V, Fernandez M, O'Neal L, et al. The REDCap consortium:  
34 Building an international community of software platform partners. *J Biomed Inform*. 2019  
35 Jul;95:103208.  
36  
37 61. Rodriguez L. Methodological challenges of sensitive topic research with adolescents. *Qual Res J*.  
38 2018 Jan 1;18(1):22–32.  
39  
40 62. Lupton D. Social Research for a COVID and Post-COVID World: An Initial Agenda [Internet]. Medium.  
41 2020 [cited 2020 May 25]. Available from: <https://medium.com/@deborahalupton/social-research-for-a-covid-and-post-covid-world-an-initial-agenda-796868f1fb0e>  
42  
43 63. Statistics Canada. A Portrait of Canadian Youth [Internet]. 2019 Mar. (A Presentation Series from  
44 Statistics Canada About the Economy, Environment and Society). Available from:  
45 <https://www150.statcan.gc.ca/n1/pub/11-631-x/11-631-x2019003-eng.pdf>  
46  
47 64. Jackson K, Bazeley P. *Qualitative data analysis with NVivo*. Sage; 2019.  
48  
49 65. Clarke AE. *Situational Analyses: Grounded Theory Mapping After the Postmodern Turn*. *Symb*  
50 *Interact*. 2003 Nov 1;26(4):553–76.  
51  
52  
53  
54  
55  
56  
57

- 1  
2  
3 66. Morse JM, Barrett M, Mayan M, Olson K, Spiers J. Verification Strategies for Establishing Reliability  
4 and Validity in Qualitative Research. *Int J Qual Methods*. 2008 Dec 19;1(2):13–22.  
5  
6 67. Morse JM. Critical Analysis of Strategies for Determining Rigor in Qualitative Inquiry. *Qual Health*  
7 *Res*. 2015 Sep 1;25(9):1212–22.  
8  
9 68. Fadlallah R, El-Jardali F, Nomier M, Hemadi N, Arif K, Langlois EV, et al. Using narratives to impact  
10 health policy-making: a systematic review. *Health Res Policy Syst*. 2019 Mar 5;17(1):26.  
11  
12 69. Epstein D, Farina C, Heidt J. The value of words: Narrative as evidence in policy making. *Evid Policy J*  
13 *Res Debate Pract*. 2014;10(2):243–58.  
14  
15 70. Shaffer VA, Brodney S, Gavaruzzi T, Zisman-Ilani Y, Munro S, Smith SK, et al. Do Personal Stories  
16 Make Patient Decision Aids More Effective? An Update from the International Patient Decision Aids  
17 Standards. *Med Decis Making*. 2021 Oct 1;41(7):897–906.  
18  
19 71. Shaffer VA, Focella ES, Hathaway A, Scherer LD, Zikmund-Fisher BJ. On the Usefulness of Narratives:  
20 An Interdisciplinary Review and Theoretical Model. *Ann Behav Med*. 2018 Apr 19;52(5):429–42.  
21  
22 72. Roberts JP, Fisher TR, Trowbridge MJ, Bent C. A design thinking framework for healthcare  
23 management and innovation. *Healthcare*. 2016 Mar 1;4(1):11–4.  
24  
25 73. Kelly T. The art of innovation. *Profile Bus*. 2002;  
26  
27 74. Chen E, Leos C, Kowitt SD, Moracco KE. Enhancing Community-Based Participatory Research Through  
28 Human-Centered Design Strategies. *Health Promot Pract*. 2020 Jan 1;21(1):37–48.  
29  
30 75. Hasso Plattner Institute of Design at Stanford. An introduction to design thinking process guide.  
31 Stanford University Palo Alto, CA; 2010.  
32  
33 76. Munro S. Knowledge Translation and Policy Impacts: How Do We Help Stakeholders Make Evidence-  
34 Based Decisions? Invited presented at: Canadian Knowledge Mobilization Forum, Virtual meeting;  
35 2020 Nov 24; Canada.  
36  
37 77. Shaffer VA, Zikmund-Fisher BJ. All Stories Are Not Alike A Purpose-, Content-, and Valence-Based  
38 Taxonomy of Patient Narratives in Decision Aids. *Med Decis Making*. 2013 Jan 1;33(1):4–13.  
39  
40 78. Vaisson G, Provencher T, Dugas M, Trottier MÈ, Chipenda Dansokho S, Colquhoun H, et al. User  
41 Involvement in the Design and Development of Patient Decision Aids and Other Personal Health  
42 Tools: A Systematic Review. *Med Decis Making*. 2021 Apr 1;41(3):261–74.  
43  
44 79. Witteman HO, Dansokho SC, Colquhoun H, Coulter A, Dugas M, Fagerlin A, et al. User-centered  
45 design and the development of patient decision aids: protocol for a systematic review. *Syst Rev*.  
46 2015;4:11.  
47  
48 80. Field AP. *Discovering Statistics Using SPSS for Windows: Advanced Techniques for Beginners*. 1st ed.  
49 Thousand Oaks, CA, USA: Sage Publications, Inc.; 2000.  
50  
51 81. Braun V, Clarke V. Reflecting on reflexive thematic analysis. *Qual Res Sport Exerc Health*. 2019 Aug  
52 8;11(4):589–97.  
53  
54  
55  
56  
57

- 1  
2  
3 82. Braun V, Clarke V. Thematic analysis: A practical guide. Sage; 2021.  
4  
5 83. Braun V, Clarke V. One size fits all? What counts as quality practice in (reflexive) thematic analysis?  
6 Qual Res Psychol. 2020 Aug 12;0(0):1–25.  
7  
8 84. Gagliardi AR, Légaré F, Brouwers MC, Webster F, Badley E, Straus S. Patient-mediated knowledge  
9 translation (PKT) interventions for clinical encounters: a systematic review. Implement Sci.  
10 2016;11:26.  
11  
12  
13  
14  
15  
16  
17  
18  
19  
20  
21  
22  
23  
24  
25  
26  
27  
28  
29  
30  
31  
32  
33  
34  
35  
36  
37  
38  
39  
40  
41  
42  
43  
44  
45  
46  
47  
48  
49  
50  
51  
52  
53  
54  
55  
56  
57



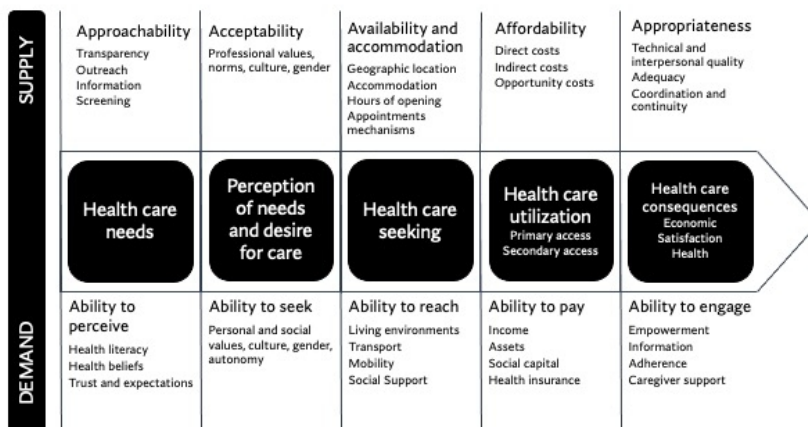

A conceptual framework of access to care, adapted from Levesque

338x190mm (54 x 54 DPI)



Youth Access to Contraception

**Interview Guide for Youth**

*[Interviewers may begin by identifying themselves: who they are and their role in the study. The questions below are a guide and will be adapted in real-time for an organic conversation. The recording will begin after introductions]*

**Introduction to participant**

Thank you so much for agreeing to participate in the project. Our conversation today is part of this 4-year grant-funded study. Our goal is to understand youth experiences of access to contraception in Canada. Through this project our aim is to listen to stories and make recommendations for models of contraception care that are youth-appropriate, empowering, and accessible. Before we review your consent form, do you have any questions for me?

Before we begin the interview, I would like to review the consent form with you and answer any questions about the form or the study itself that you may have. If you don't mind, please pull up the consent form that our research coordinator shared with you by email and read through once more. Once you've done that, you can let me know if you consent to participate in today's interview, then we'll begin.

**\*Instructions for interviewers\***

- Provide a summary of the consent form.
- Participant reviews the consent form then provides their verbal consent to participate before continuing.
- Confirm that participants have had a chance to review the interview guide (table).
- Interviewers may begin by identifying themselves: who they are, where they are from, and their social position in relation to the study.
- The recording will begin after introductions. **Start recording.**

|   | Question                                                                             | Optional follow-up questions                                                                                                                                                                                                                     |
|---|--------------------------------------------------------------------------------------|--------------------------------------------------------------------------------------------------------------------------------------------------------------------------------------------------------------------------------------------------|
|   | Experiences of providing care                                                        |                                                                                                                                                                                                                                                  |
| 1 | Can you tell me a little bit about your experiences of accessing contraception care? | I'd like to learn more about <i>[the experiences the participant described]</i> . Can you tell me step by step what that looked like? Paint me a picture, if you can. <i>[Repeat the question to learn about other experiences, if relevant]</i> |
| 2 | What (other) methods have you used? What do you like most/least about those methods? | Do you use these methods for any reason other than birth control? If yes, what do you like about those methods?                                                                                                                                  |

## Youth Access to Contraception

|    |                                                                                                                                                                                                                         |                                                                                                                                                                                                                                                                               |
|----|-------------------------------------------------------------------------------------------------------------------------------------------------------------------------------------------------------------------------|-------------------------------------------------------------------------------------------------------------------------------------------------------------------------------------------------------------------------------------------------------------------------------|
|    | Availability and accommodation                                                                                                                                                                                          |                                                                                                                                                                                                                                                                               |
| 3  | Did you feel that all contraception methods were options for you? If not, why not? How did this impact your decision?                                                                                                   |                                                                                                                                                                                                                                                                               |
| 4  | What is easy/hard about accessing your preferred method? What is easy/hard about accessing other methods?                                                                                                               |                                                                                                                                                                                                                                                                               |
| 5  | What contraception services are available in your community that you are aware of?                                                                                                                                      | Do people have to leave the community to access care? If so, where to and how do they get there?                                                                                                                                                                              |
| 6  | In your view, how welcoming are the spaces to youth? What are some of the things that make the spaces more or less welcoming?                                                                                           |                                                                                                                                                                                                                                                                               |
| 7  | If you or a relative needed information about options for preventing a pregnancy, is there a safe, knowledgeable person or place in your community to go to? Who or where would this be?                                | <i>[Probe about a person, an organization, a resource]</i><br>Do you feel as knowledgeable as you'd like to be about options for birth control? What are some strategies that you think would work well for increasing awareness about options for birth control among youth? |
|    | Approachability and affordability                                                                                                                                                                                       |                                                                                                                                                                                                                                                                               |
| 8  | Do you feel that all contraception methods are options for you?                                                                                                                                                         | If no, why not?<br>If yes, what would make it possible?                                                                                                                                                                                                                       |
| 9  | Thinking about the contraception experiences you have mentioned so far, what are the costs that you have experienced?                                                                                                   | <i>Probe for costs that were covered by a benefits plan, out of pocket for prescriptions, out of pocket for travel, and any indirect financial impact on loss of work, childcare expenses, etc</i>                                                                            |
| 10 | Was there ever a situation where you needed to access contraception care and challenges related to costs, health benefits, or provider availability impacted or delayed you from getting services when you needed them? | If yes ->, Can you tell us about that?                                                                                                                                                                                                                                        |
| 11 | In general, how do you see these barriers impacting youth's access to care?                                                                                                                                             | What would make it easier for you to reach contraception care?                                                                                                                                                                                                                |
|    | Acceptability (i.e. Culturally safe care)                                                                                                                                                                               |                                                                                                                                                                                                                                                                               |

Youth Access to Contraception

|                                                 |                                                                                                                                                                                                    |                                                                                                                                                                                                                                                                                                                                                                                                                                                                                                                                 |
|-------------------------------------------------|----------------------------------------------------------------------------------------------------------------------------------------------------------------------------------------------------|---------------------------------------------------------------------------------------------------------------------------------------------------------------------------------------------------------------------------------------------------------------------------------------------------------------------------------------------------------------------------------------------------------------------------------------------------------------------------------------------------------------------------------|
| 12                                              | What does “culturally appropriate” or “culturally safe” care mean to you in the case of contraception?                                                                                             | Have you ever had an experience of accessing contraception care that you would characterize as culturally safe? What made it so? Have you ever had an experience of accessing contraception care that you would characterize as culturally <b>unsafe</b> ? What made it so?                                                                                                                                                                                                                                                     |
| 13                                              | Have you ever avoided getting contraception care because you felt it wouldn't be culturally safe? Please tell me more about that experience.                                                       | If bringing culture into your contraception care experience is important to you, what would you need from the health care system to be able to do it safely and accessibly?                                                                                                                                                                                                                                                                                                                                                     |
| 14                                              | What are the things that give you a feeling of trust with your health care provider when talking about contraception?                                                                              |                                                                                                                                                                                                                                                                                                                                                                                                                                                                                                                                 |
| Shared decision making                          |                                                                                                                                                                                                    |                                                                                                                                                                                                                                                                                                                                                                                                                                                                                                                                 |
| 14                                              | Tell me how you made the decision to use your current method. What were the factors that went into your decision?                                                                                  | <ul style="list-style-type: none"> <li>• Tell me how you made the decision to use your current method. What were the factors that went into your decision?</li> <li>• What information did you use to help make your decision?</li> <li>• What was most helpful to you in making your decision? <i>[Probe about a person, an organization, a resource and healthcare providers]</i></li> <li>• How did you feel about your decision when you made it? Did you feel certain? How do you feel about your decision now?</li> </ul> |
| 15                                              | Tell us how family members are involved when you're making choices about contraception. How are your partner/s involved in those choices? How is your broader community involved in those choices? | <ul style="list-style-type: none"> <li>• We are curious to know about any resistance to contraception care in the community, for religious or cultural reasons. How do people around you feel about family planning services?</li> <li>• Tell me about other people and their role in your contraception choices. Who else, if anyone, influences your choice about method? Tell me about how he/she/they influenced you.</li> </ul>                                                                                            |
| Appropriateness (of health services and system) |                                                                                                                                                                                                    |                                                                                                                                                                                                                                                                                                                                                                                                                                                                                                                                 |
| 16                                              | What community-run, youth health services are available to you in general, for any health services? What about contraception/family planning care?                                                 |                                                                                                                                                                                                                                                                                                                                                                                                                                                                                                                                 |

## Youth Access to Contraception

|    |    |                                                                                                                                                                   |
|----|----|-------------------------------------------------------------------------------------------------------------------------------------------------------------------|
| 1  |    |                                                                                                                                                                   |
| 2  |    |                                                                                                                                                                   |
| 3  |    |                                                                                                                                                                   |
| 4  | 17 | Ideally, where would you like to receive family planning care?                                                                                                    |
| 5  |    | <i>Supplementary question if clarification needed: What existing clinic feels like the place you would be most comfortable to access contraception care? Why?</i> |
| 6  |    |                                                                                                                                                                   |
| 7  |    |                                                                                                                                                                   |
| 8  | 18 | Ideally, who or which health care provider would be the most comfortable person for you to access contraception care?                                             |
| 9  |    | <i>Probe also for midwives, allied health professionals, community health workers, patient navigators, doulas</i>                                                 |
| 10 |    |                                                                                                                                                                   |
| 11 |    | Ending questions                                                                                                                                                  |
| 12 | 19 | If you could wave a magic wand and change the health system, what would it look like for youth trying to access contraception?                                    |
| 13 |    |                                                                                                                                                                   |
| 14 |    |                                                                                                                                                                   |
| 15 | 20 | Is there anything that you might not have thought about before that occurred to you during this interview?                                                        |
| 16 |    | What do you like about them?                                                                                                                                      |
| 17 |    |                                                                                                                                                                   |
| 18 | 21 | Is there anything else you think I should know to better understand how contraception access could be improved?                                                   |
| 19 |    |                                                                                                                                                                   |
| 20 |    |                                                                                                                                                                   |
| 21 | 22 | Finally, what motivated you to participate in the study?                                                                                                          |
| 22 |    |                                                                                                                                                                   |

That concludes the interview. I encourage you to check out the resources listed on your consent form, if you're keen to learn about the confidential and free sexual and reproductive health and mental health supports available to you.

Do you have any questions for me?

Youth Access to Contraception

**Interview Guide for Health Care Providers**

*[Interviewers may begin by identifying themselves: who they are and their role in the study. The questions below are a guide and will be adapted in real-time for an organic conversation. The recording will begin after introductions]*

**Introduction to participant**

Thank you so much for agreeing to participate in the project. Our conversation today is part of this 4-year grant-funded study. Our goal is to understand youth experiences of access to contraception in Canada. Through this project our aim is to listen to stories and make recommendations for models of contraception care that are youth-appropriate, empowering, and accessible. Before we review your consent form, do you have any questions for me?

Before we begin the interview, I would like to review the consent form with you and answer any questions about the form or the study itself that you may have. If you don't mind, please pull up the consent form that our research coordinator shared with you by email and read through once more. Once you've done that, you can let me know if you consent to participate in today's interview, then we'll begin.

**\*Instructions for interviewers\***

- Provide a summary of the consent form.
- Participant reviews the consent form then provides their verbal consent to participate before continuing.
- Confirm that participants have had a chance to review the interview guide (table).
- Interviewers may begin by identifying themselves: who they are, where they are from, and their social position in relation to the study.
- The recording will begin after introductions. **Start recording.**

|   | Question                                                                                                                                                                                                                                                                                                                                                                                                                                                                      | Optional follow-up questions |
|---|-------------------------------------------------------------------------------------------------------------------------------------------------------------------------------------------------------------------------------------------------------------------------------------------------------------------------------------------------------------------------------------------------------------------------------------------------------------------------------|------------------------------|
|   | Demographics                                                                                                                                                                                                                                                                                                                                                                                                                                                                  |                              |
| 0 | <p>Before we start our conversation, I have a few demographic questions. If you don't want to answer a particular question, we can skip it.</p> <ol style="list-style-type: none"> <li>1. What are the first three digits of your postal code?</li> <li>2. What is your primary speciality?</li> <li>3. What is your age?</li> <li>4. What is your gender?</li> <li>5. Do you have past experience providing contraceptive services to youth (up to 25 years old)?</li> </ol> |                              |
|   | Experiences of providing care                                                                                                                                                                                                                                                                                                                                                                                                                                                 |                              |

## Youth Access to Contraception

|   |                                                                                                                                 |                                                                                                                                                                                                                                                                                                                                                                                                                                                                                                                       |
|---|---------------------------------------------------------------------------------------------------------------------------------|-----------------------------------------------------------------------------------------------------------------------------------------------------------------------------------------------------------------------------------------------------------------------------------------------------------------------------------------------------------------------------------------------------------------------------------------------------------------------------------------------------------------------|
| 1 | Can you tell me a little bit about who you are, where you are from, and the communities where you practice?                     |                                                                                                                                                                                                                                                                                                                                                                                                                                                                                                                       |
| 2 | Tell me about your experience providing contraception to youth.                                                                 | I'd like to learn more about [ <i>the experiences the participant described</i> ]. Can you tell me step by step what that looked like? Paint me a picture, if you can. [ <i>Repeat the question to learn about other experiences, if relevant</i> ]                                                                                                                                                                                                                                                                   |
| 3 | How did you become involved in contraception care?                                                                              |                                                                                                                                                                                                                                                                                                                                                                                                                                                                                                                       |
|   | Availability and accommodation                                                                                                  |                                                                                                                                                                                                                                                                                                                                                                                                                                                                                                                       |
| 4 | Can you paint me a picture of what it might look like for a youth client who accesses contraception services in your community? | <ul style="list-style-type: none"> <li>• What other contraception services are available in your community?</li> <li>• Where do clients come from to access services?</li> <li>• Do people need to leave the community to access services, if so where to?</li> <li>• How easy/hard would you say it is for youth to access these services when they need them? Why?</li> <li>• Are there any youth-specific programs or services? Can you describe them?</li> </ul> <i>Probe for both prescribing and dispensing</i> |
| 5 | What methods of contraception do you offer?                                                                                     | Are there any methods you wish you could offer?                                                                                                                                                                                                                                                                                                                                                                                                                                                                       |
| 6 | Tell me about your practice environment where you currently provide contraception                                               |                                                                                                                                                                                                                                                                                                                                                                                                                                                                                                                       |
| 7 | Tell me about the youth who seek contraception in your setting.                                                                 | Do newcomer or immigrant youth access your services?<br>If yes: In your view, how welcoming are the spaces to youth/newcomer youth? What are some of the things that make spaces welcoming?                                                                                                                                                                                                                                                                                                                           |
|   | Approachability                                                                                                                 |                                                                                                                                                                                                                                                                                                                                                                                                                                                                                                                       |
| 8 | Do you feel that all contraception methods are options for you to provide?                                                      | If no, why not?<br>If yes, what makes it possible? ( <i>Probe for education, funding, infrastructure</i> )                                                                                                                                                                                                                                                                                                                                                                                                            |

## Youth Access to Contraception

|                        |                                                                                                               |                                                                                                                                                                                                                                                                                                                                                                                                     |
|------------------------|---------------------------------------------------------------------------------------------------------------|-----------------------------------------------------------------------------------------------------------------------------------------------------------------------------------------------------------------------------------------------------------------------------------------------------------------------------------------------------------------------------------------------------|
| 9                      | How does travel or transportation impact accessibility to contraception services for youth in your community? | <ul style="list-style-type: none"> <li>• Are you aware of how seasonal weather, road conditions, or climate events impact youth ability to access services?</li> <li>• What is your perception of how youth are with local or far away contraception services?</li> </ul>                                                                                                                           |
| Affordability          |                                                                                                               |                                                                                                                                                                                                                                                                                                                                                                                                     |
| 10                     | What are the costs of accessing contraception care?                                                           | <ul style="list-style-type: none"> <li>• Are there hidden costs you are aware of, such as for travel?</li> <li>• Are you aware of what health benefits and subsidies exist for youth to help cover these hidden costs?</li> <li>• Have there been policy or funding structure changes over the last 10 years that impacted your ability to serve youth clients for the better?</li> </ul>           |
| 11                     | Was there ever a situation where your patient was not able to access contraception care due to costs?         |                                                                                                                                                                                                                                                                                                                                                                                                     |
| Acceptability          |                                                                                                               |                                                                                                                                                                                                                                                                                                                                                                                                     |
| 12                     | What are the ways that you establish trust with youth when talking about contraception?                       | <ul style="list-style-type: none"> <li>• How about building trust with trans or Two Spirit youth seeking contraception care?</li> <li>• Do you have any best practices to share around protecting youth privacy and confidentiality? Please tell me about them.</li> </ul>                                                                                                                          |
| 13                     | What does “culturally appropriate” or “culturally safe” care mean to you in the case of contraception?        | <ul style="list-style-type: none"> <li>• How do you create space for diverse identities, knowledges, and cultural practices in your care?</li> <li>• Would you characterize your practice environment to be culturally safe? What made it so? [<i>Probe about a person, an organization, a policy, a resource or educational pathway, training</i>] What or whom has been most limiting?</li> </ul> |
| Shared decision making |                                                                                                               |                                                                                                                                                                                                                                                                                                                                                                                                     |
| 14                     | When you discuss contraceptive options with youth, what does it look like? Can you describe it for me?        | <ul style="list-style-type: none"> <li>• Is there anything you would do differently if you were to provide contraception care to a newcomer or immigrant youth?</li> </ul>                                                                                                                                                                                                                          |

## Youth Access to Contraception

|                                                 |                                                                                                                                                                                                                                                                                       |                                                                                                                                                                                                                                                                                                                                     |
|-------------------------------------------------|---------------------------------------------------------------------------------------------------------------------------------------------------------------------------------------------------------------------------------------------------------------------------------------|-------------------------------------------------------------------------------------------------------------------------------------------------------------------------------------------------------------------------------------------------------------------------------------------------------------------------------------|
| 15                                              | We are curious to know about consent for contraception care. One of the concepts we are exploring in this project is reproductive coercion. This is when a person feels pressure or control from others when making a reproductive choice. How does this concept appear in your care? | <ul style="list-style-type: none"> <li>• What are the barriers, if any, to achieving consent for contraception care?</li> <li>• What is your perception around resistance to contraception care in the community, for family, religious or cultural reasons? How does the community feel about family planning services?</li> </ul> |
| Appropriateness (of health services and system) |                                                                                                                                                                                                                                                                                       |                                                                                                                                                                                                                                                                                                                                     |
| 16                                              | What would you say are the characteristics of good contraceptive care for youth?                                                                                                                                                                                                      | <ul style="list-style-type: none"> <li>• Are there any characteristics that are unique to newcomer or immigrant youth?</li> <li>• Is this type of care available in your community? In your practice setting?</li> </ul>                                                                                                            |
| 17                                              | Where is there opportunity to improve services? What would need to happen to facilitate this change?                                                                                                                                                                                  |                                                                                                                                                                                                                                                                                                                                     |
| 18                                              | What resources would support the sustainability of contraception care for providers?                                                                                                                                                                                                  | <i>Probe for compensation models, benefits, scope of practice, operating and start-up costs, administrative burden, time to counsel and support patients, time to build trust, building communities of practice and relationships</i>                                                                                               |
| Ending questions                                |                                                                                                                                                                                                                                                                                       |                                                                                                                                                                                                                                                                                                                                     |
| 19                                              | If you could wave a magic wand and change the health system, what would it look like for youth trying to access contraception?                                                                                                                                                        |                                                                                                                                                                                                                                                                                                                                     |
| 20                                              | Is there anything that you might not have thought about before that occurred to you during this interview?                                                                                                                                                                            |                                                                                                                                                                                                                                                                                                                                     |
| 21                                              | Is there anything else you think I should know to better understand how providers make choices to support their youth patients in contraceptive care and how services could be improved?                                                                                              |                                                                                                                                                                                                                                                                                                                                     |
| 22                                              | Finally, what motivated you to participate in the study?                                                                                                                                                                                                                              |                                                                                                                                                                                                                                                                                                                                     |

That concludes the interview. I encourage you to check out the resources listed on your consent form, if you're keen to learn about the confidential and free sexual and reproductive health and mental health supports available to you and your patients.

Do you have any questions for me?
