# Supplementary material for: Can youth-engaged research facilitate equitable access to contraception in Canada? The qualitative study protocol for the Ask Us project
Source: PubMed Central journal article supplement — BMJ Open. 2023 Mar 2;13(3):e070904. doi: 10.1136/bmjopen-2022-070904 (PMC9990688; doi:10.1136/bmjopen-2022-070904), 2023-03-02
Supplement: bmjopen-2022-070904.reviewer_comments.pdf [file bmjopen-2022-070904.reviewer_comments.pdf]

## PEER REVIEW HISTORY

BMJ Open publishes all reviews undertaken for accepted manuscripts. Reviewers are asked to complete a checklist review form (<http://bmjopen.bmj.com/site/about/resources/checklist.pdf>) and are provided with free text boxes to elaborate on their assessment. These free text comments are reproduced below.

## ARTICLE DETAILS

|                            |                                                                                                                                                                                                                                                                                          |
|----------------------------|------------------------------------------------------------------------------------------------------------------------------------------------------------------------------------------------------------------------------------------------------------------------------------------|
| <b>TITLE (PROVISIONAL)</b> | Can youth-engaged research facilitate equitable access to contraception in Canada? A qualitative study protocol                                                                                                                                                                          |
| <b>AUTHORS</b>             | Munro, Sarah; Di Meglio, Giuseppina; Williams, Aleyah; Barbic, Skye; Begun, Stephanie; Black, Amanda; Carson, Andrea; Fortin, Michelle; Jacob, Kaiya; Khan, Zeba; Martin-Misener, Ruth; Meherali, Salima; Paller, Victoria; Seiyad, Hajar; Vallée, Carol-Anne; Wahl, Kate; Norman, Wendy |

This article was not externally reviewed at BMJ Open. Protocols that have been independently assessed prior to submission to BMJ Open are usually fast-tracked to publication on the grounds that further substantial changes will not be possible. This independent assessment will usually be external, independent review for both a substantial grant award from a non-commercial or government funder and ethics approval.
