# Supplementary material for: Can youth-engaged research facilitate equitable access to contraception in Canada? The qualitative study protocol for the Ask Us project
Source: PubMed Central journal article supplement — BMJ Open. 2023 Mar 2;13(3):e070904. doi: 10.1136/bmjopen-2022-070904 (PMC9990688; doi:10.1136/bmjopen-2022-070904), 2023-03-02
Supplement: bmjopen-2022-070904supp002.pdf [file bmjopen-2022-070904supp002.pdf]

## Youth Access to Contraception

**Interview Guide for Health Care Providers**

*[Interviewers may begin by identifying themselves: who they are and their role in the study. The questions below are a guide and will be adapted in real-time for an organic conversation. The recording will begin after introductions]*

**Introduction to participant**

Thank you so much for agreeing to participate in the project. Our conversation today is part of this 4-year grant-funded study. Our goal is to understand youth experiences of access to contraception in Canada. Through this project our aim is to listen to stories and make recommendations for models of contraception care that are youth-appropriate, empowering, and accessible. Before we review your consent form, do you have any questions for me?

Before we begin the interview, I would like to review the consent form with you and answer any questions about the form or the study itself that you may have. If you don't mind, please pull up the consent form that our research coordinator shared with you by email and read through once more. Once you've done that, you can let me know if you consent to participate in today's interview, then we'll begin.

**\*Instructions for interviewers\***

- *Provide a summary of the consent form.*
- *Participant reviews the consent form then provides their verbal consent to participate before continuing.*
- *Confirm that participants have had a chance to review the interview guide (table).*
- *Interviewers may begin by identifying themselves: who they are, where they are from, and their social position in relation to the study.*
- *The recording will begin after introductions. **Start recording.***

|   | Question                                                                                                                                                                                                                                                                                                                                                                                                                                                                      | Optional follow-up questions |
|---|-------------------------------------------------------------------------------------------------------------------------------------------------------------------------------------------------------------------------------------------------------------------------------------------------------------------------------------------------------------------------------------------------------------------------------------------------------------------------------|------------------------------|
|   | Demographics                                                                                                                                                                                                                                                                                                                                                                                                                                                                  |                              |
| 0 | <p>Before we start our conversation, I have a few demographic questions. If you don't want to answer a particular question, we can skip it.</p> <ol style="list-style-type: none"> <li>1. What are the first three digits of your postal code?</li> <li>2. What is your primary speciality?</li> <li>3. What is your age?</li> <li>4. What is your gender?</li> <li>5. Do you have past experience providing contraceptive services to youth (up to 25 years old)?</li> </ol> |                              |
|   | Experiences of providing care                                                                                                                                                                                                                                                                                                                                                                                                                                                 |                              |

## Youth Access to Contraception

|                                |                                                                                                                                 |                                                                                                                                                                                                                                                                                                                                                                                                                                                                                                                       |
|--------------------------------|---------------------------------------------------------------------------------------------------------------------------------|-----------------------------------------------------------------------------------------------------------------------------------------------------------------------------------------------------------------------------------------------------------------------------------------------------------------------------------------------------------------------------------------------------------------------------------------------------------------------------------------------------------------------|
| 1                              | Can you tell me a little bit about who you are, where you are from, and the communities where you practice?                     |                                                                                                                                                                                                                                                                                                                                                                                                                                                                                                                       |
| 2                              | Tell me about your experience providing contraception to youth.                                                                 | I'd like to learn more about [ <i>the experiences the participant described</i> ]. Can you tell me step by step what that looked like? Paint me a picture, if you can. [ <i>Repeat the question to learn about other experiences, if relevant</i> ]                                                                                                                                                                                                                                                                   |
| 3                              | How did you become involved in contraception care?                                                                              |                                                                                                                                                                                                                                                                                                                                                                                                                                                                                                                       |
| Availability and accommodation |                                                                                                                                 |                                                                                                                                                                                                                                                                                                                                                                                                                                                                                                                       |
| 4                              | Can you paint me a picture of what it might look like for a youth client who accesses contraception services in your community? | <ul style="list-style-type: none"> <li>• What other contraception services are available in your community?</li> <li>• Where do clients come from to access services?</li> <li>• Do people need to leave the community to access services, if so where to?</li> <li>• How easy/hard would you say it is for youth to access these services when they need them? Why?</li> <li>• Are there any youth-specific programs or services? Can you describe them?</li> </ul> <i>Probe for both prescribing and dispensing</i> |
| 5                              | What methods of contraception do you offer?                                                                                     | Are there any methods you wish you could offer?                                                                                                                                                                                                                                                                                                                                                                                                                                                                       |
| 6                              | Tell me about your practice environment where you currently provide contraception                                               |                                                                                                                                                                                                                                                                                                                                                                                                                                                                                                                       |
| 7                              | Tell me about the youth who seek contraception in your setting.                                                                 | Do newcomer or immigrant youth access your services?<br>If yes: In your view, how welcoming are the spaces to youth/newcomer youth? What are some of the things that make spaces welcoming?                                                                                                                                                                                                                                                                                                                           |
| Approachability                |                                                                                                                                 |                                                                                                                                                                                                                                                                                                                                                                                                                                                                                                                       |
| 8                              | Do you feel that all contraception methods are options for you to provide?                                                      | If no, why not?<br>If yes, what makes it possible? ( <i>Probe for education, funding, infrastructure</i> )                                                                                                                                                                                                                                                                                                                                                                                                            |

## Youth Access to Contraception

|    |                                                                                                               |                                                                                                                                                                                                                                                                                                                                                                                                     |
|----|---------------------------------------------------------------------------------------------------------------|-----------------------------------------------------------------------------------------------------------------------------------------------------------------------------------------------------------------------------------------------------------------------------------------------------------------------------------------------------------------------------------------------------|
| 9  | How does travel or transportation impact accessibility to contraception services for youth in your community? | <ul style="list-style-type: none"> <li>• Are you aware of how seasonal weather, road conditions, or climate events impact youth ability to access services?</li> <li>• What is your perception of how youth are with local or far away contraception services?</li> </ul>                                                                                                                           |
|    | Affordability                                                                                                 |                                                                                                                                                                                                                                                                                                                                                                                                     |
| 10 | What are the costs of accessing contraception care?                                                           | <ul style="list-style-type: none"> <li>• Are there hidden costs you are aware of, such as for travel?</li> <li>• Are you aware of what health benefits and subsidies exist for youth to help cover these hidden costs?</li> <li>• Have there been policy or funding structure changes over the last 10 years that impacted your ability to serve youth clients for the better?</li> </ul>           |
| 11 | Was there ever a situation where your patient was not able to access contraception care due to costs?         |                                                                                                                                                                                                                                                                                                                                                                                                     |
|    | Acceptability                                                                                                 |                                                                                                                                                                                                                                                                                                                                                                                                     |
| 12 | What are the ways that you establish trust with youth when talking about contraception?                       | <ul style="list-style-type: none"> <li>• How about building trust with trans or Two Spirit youth seeking contraception care?</li> <li>• Do you have any best practices to share around protecting youth privacy and confidentiality? Please tell me about them.</li> </ul>                                                                                                                          |
| 13 | What does “culturally appropriate” or “culturally safe” care mean to you in the case of contraception?        | <ul style="list-style-type: none"> <li>• How do you create space for diverse identities, knowledges, and cultural practices in your care?</li> <li>• Would you characterize your practice environment to be culturally safe? What made it so? [<i>Probe about a person, an organization, a policy, a resource or educational pathway, training</i>] What or whom has been most limiting?</li> </ul> |
|    | Shared decision making                                                                                        |                                                                                                                                                                                                                                                                                                                                                                                                     |
| 14 | When you discuss contraceptive options with youth, what does it look like? Can you describe it for me?        | <ul style="list-style-type: none"> <li>• Is there anything you would do differently if you were to provide contraception care to a newcomer or immigrant youth?</li> </ul>                                                                                                                                                                                                                          |

## Youth Access to Contraception

|                                                 |                                                                                                                                                                                                                                                                                       |                                                                                                                                                                                                                                                                                                                                     |
|-------------------------------------------------|---------------------------------------------------------------------------------------------------------------------------------------------------------------------------------------------------------------------------------------------------------------------------------------|-------------------------------------------------------------------------------------------------------------------------------------------------------------------------------------------------------------------------------------------------------------------------------------------------------------------------------------|
| 15                                              | We are curious to know about consent for contraception care. One of the concepts we are exploring in this project is reproductive coercion. This is when a person feels pressure or control from others when making a reproductive choice. How does this concept appear in your care? | <ul style="list-style-type: none"> <li>• What are the barriers, if any, to achieving consent for contraception care?</li> <li>• What is your perception around resistance to contraception care in the community, for family, religious or cultural reasons? How does the community feel about family planning services?</li> </ul> |
| Appropriateness (of health services and system) |                                                                                                                                                                                                                                                                                       |                                                                                                                                                                                                                                                                                                                                     |
| 16                                              | What would you say are the characteristics of good contraceptive care for youth?                                                                                                                                                                                                      | <ul style="list-style-type: none"> <li>• Are there any characteristics that are unique to newcomer or immigrant youth?</li> <li>• Is this type of care available in your community? In your practice setting?</li> </ul>                                                                                                            |
| 17                                              | Where is there opportunity to improve services? What would need to happen to facilitate this change?                                                                                                                                                                                  |                                                                                                                                                                                                                                                                                                                                     |
| 18                                              | What resources would support the sustainability of contraception care for providers?                                                                                                                                                                                                  | <i>Probe for compensation models, benefits, scope of practice, operating and start-up costs, administrative burden, time to counsel and support patients, time to build trust, building communities of practice and relationships</i>                                                                                               |
| Ending questions                                |                                                                                                                                                                                                                                                                                       |                                                                                                                                                                                                                                                                                                                                     |
| 19                                              | If you could wave a magic wand and change the health system, what would it look like for youth trying to access contraception?                                                                                                                                                        |                                                                                                                                                                                                                                                                                                                                     |
| 20                                              | Is there anything that you might not have thought about before that occurred to you during this interview?                                                                                                                                                                            |                                                                                                                                                                                                                                                                                                                                     |
| 21                                              | Is there anything else you think I should know to better understand how providers make choices to support their youth patients in contraceptive care and how services could be improved?                                                                                              |                                                                                                                                                                                                                                                                                                                                     |
| 22                                              | Finally, what motivated you to participate in the study?                                                                                                                                                                                                                              |                                                                                                                                                                                                                                                                                                                                     |

That concludes the interview. I encourage you to check out the resources listed on your consent form, if you're keen to learn about the confidential and free sexual and reproductive health and mental health supports available to you and your patients.

Do you have any questions for me?
